# Supplementary material
Source: Royal Society of Chemistry journal article supplement (doi:10.1039/d6cc01046f)
Supplement: d6cc01046f1.pdf [file d6cc01046f1.pdf]

*Supporting Information*

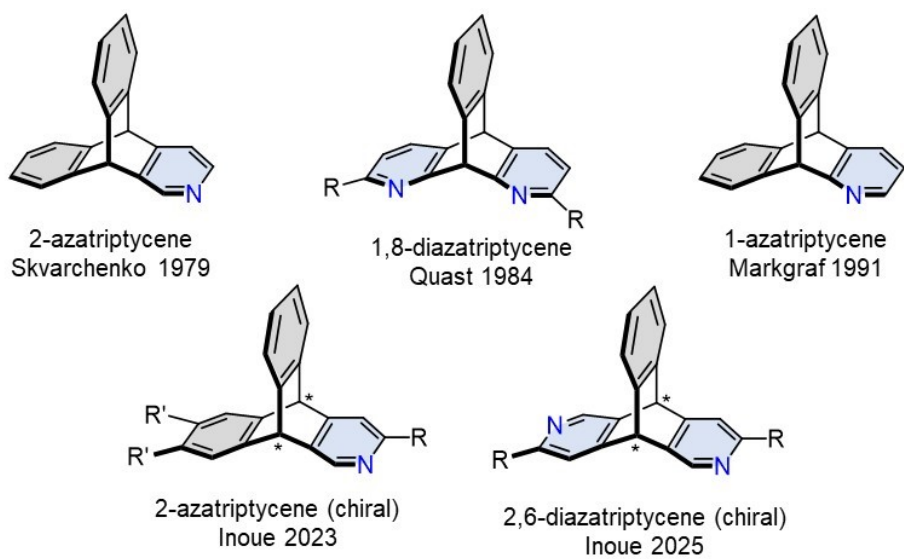

**Figure S1.** Chemical structures of azatriptycenes in the previous works.

## General

$^1\text{H}$  and  $^{13}\text{C}$  spectra were recorded on a JNM-ECZ-600R instrument at 600 and 151 MHz, respectively. Samples were analyzed by  $\text{CDCl}_3$ , and the chemical shift values were expressed relative to  $\text{Me}_4\text{Si}$  as an internal standard. Analytical thin layer chromatography (TLC) was performed with silica gel 60  $\text{F}_{254}$  plates or silica gel 60  $\text{NH}_2$   $\text{F}_{254\text{S}}$  plates. Column chromatography was performed with Silica gel 60N  $\text{SiO}_2$  or CHROMATOREX NH-DM1020 NH- $\text{SiO}_2$ . Preparative gel-permeation chromatography (GPC) was carried out by a JAI LC-9204 recycling preparative high-performance liquid chromatography (HPLC) equipped with a JAI JAIGEL-2HR Plus GPC column (solvent:  $\text{CH}_2\text{Cl}_2$ ). HRMS data were obtained on a Thermo Fisher Scientific Orbitrap Eclipse Tribrid mass spectrometer (ESI). The PL lifetime measurement was performed on a Hamamatsu Photonics Quantaaurus-Tau fluorescence lifetime spectrometer C16361-02 system. UV-vis spectra were recorded on a JASCO V-670 spectrometer. Absolute PL quantum efficiency was calculated on a JASCO FP-8500 with an ILF-835 integrating sphere.

## Materials

### Commercially available compounds:

1 M KO<sup>t</sup>Bu tetrahydrofuran (THF) solution,  $\text{BF}_3\text{OEt}_2$ , 1 M KHMDS THF solution, TfOH,  $\text{Tf}_2\text{NH}$ , HBr solution, and  $\text{Na}_2\text{SO}_4$

THF (dehydrated), toluene (dehydrated),  $\text{CHCl}_3$ ,  $\text{CH}_2\text{Cl}_2$ , hexane, MeCN

### Compounds prepared as described in the literature:

#### **TCBO:**

R. Inoue, K. Furumoto, T. Osada, Y. Morisaki, *Eur. J. Org. Chem.* **2022**, e202200041.

#### **Tetrakis(methylene)-benzobicyclo[2.2.2]octane:**

R. Inoue, S. Namba, Y. Morisaki, *Bull. Chem. Soc. Jpn.* **2023**, 96, 775–777.

## X-ray structure determination

Crystals suitable for X-ray diffraction studies were analyzed using a Rigaku MicroMax-007HFM MoKa rotating anode generator equipped with VariMax optics, an AFC1 goniometer, and MERCURY CCD-2 detector. The reflection data were integrated, scaled and averaged using Rigaku CrysAlis<sup>PRO</sup>. The structures were solved by a direct method (SHELXT) and refined using a full-matrix least-squares method on F2 for all reflections (SHELXL-2018/3). The calculations were performed on the Olex2 program package. Crystallographic data are given in Table S2. CCDC-2498092–2498098 contains the supplementary crystallographic data for this paper. These data can be obtained free of charge from The Cambridge Crystallographic Data Centre via <https://www.ccdc.cam.ac.uk/structures/>

**Scheme S1.** Synthesis of **1**.<sup>[a]</sup>

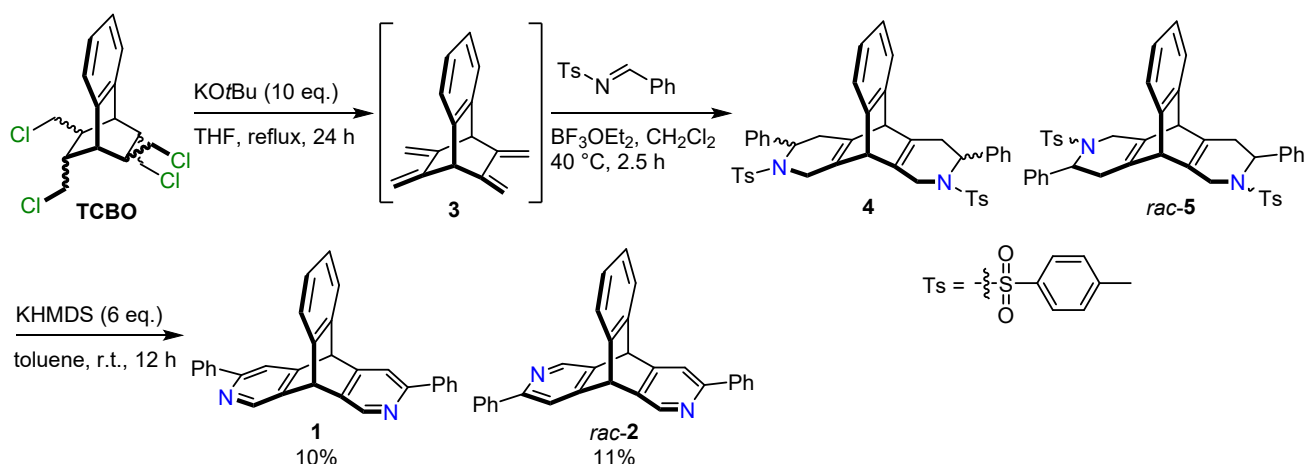

1 M KO<sup>t</sup>Bu THF solution (5 mL, 5 mmol) was added to a solution of **TCBO** (176.10 mg, 0.50 mmol) in THF (12.5 mL) under Ar. After refluxing for 16 h, SiO<sub>2</sub> was added to the reaction mixture and dried under vacuum. The residue was purified by column chromatography on dried SiO<sub>2</sub> (CH<sub>2</sub>Cl<sub>2</sub> as an eluent) to obtain a solution of **3** in CH<sub>2</sub>Cl<sub>2</sub> (around 25 mL). The solution of **3** was added to a mixture of phenyl *N*-tosylimine (518.6 mg, 2.00 mmol), BF<sub>3</sub>OEt<sub>2</sub> (0.19 mL, 1.50 mmol) in CH<sub>2</sub>Cl<sub>2</sub> (5 mL) under Ar. After the mixture was heated at 40 °C for 2.5 h, the residue was purified by column chromatography on NH-SiO<sub>2</sub> (CH<sub>2</sub>Cl<sub>2</sub>/hexane = 1/1 as an eluent), affording **4** and *rac*-**5**. KHMDS, obtained by drying a 1 M KHMDS THF solution (3 mL, 3 mmol) under vacuum to remove the solvent, was dissolved in toluene (5 mL) under Ar. The solution was added to a solution of **4** and *rac*-**5** in toluene (15 mL) under Ar. After the mixture was stirred 16 h, water was added to the mixture. The organic layer was extracted with toluene three times. The combined organic layer was dried over Na<sub>2</sub>SO<sub>4</sub>. Na<sub>2</sub>SO<sub>4</sub> was removed by filtration, and the solvent was removed with a rotary evaporator. The residue was purified by column chromatography on NH-SiO<sub>2</sub> (hexane/CH<sub>2</sub>Cl<sub>2</sub> = 4/1 to 1/3 as an eluent) and purified by GPC to obtain **1** (21.3 mg, 0.052 mmol, 10%) and *rac*-**2** (21.8 mg, 0.053 mmol, 11%) as a white solid.

[a] Under the same conditions as previously reported (toluene, 80 °C, 5 h), the isolated yield of **1** and *rac*-**2** was 6% and 7% in our hands.

**1**

$R_f = 0.28$  (hexane/CH<sub>2</sub>Cl<sub>2</sub> = 1:4 as an eluent, NH<sub>2</sub>-SiO<sub>2</sub>)

<sup>1</sup>H NMR (CDCl<sub>3</sub>, 600 MHz)  $\delta$  5.62 (s, 1H), 5.72 (s, 1H), 7.07–7.15 (m, 2H), 7.43 (dd,  $J = 7.6$  Hz, 2H), 7.43 (dd,  $J = 7.6$  Hz, 4H), 7.49 (d,  $J = 8.3$  Hz, 1H), 7.52 (d,  $J = 7.6$  Hz, 1H), 7.82 (s, 2H), 7.89 (d,  $J = 6.9$  Hz, 4H), 8.74 (s, 2H) ppm;

<sup>13</sup>C NMR (CDCl<sub>3</sub>, 151 MHz)  $\delta$  47.5, 53.5, 116.5, 124.4, 124.7, 126.0, 126.6, 127.1, 128.8, 129.0, 138.5, 139.4, 142.3, 143.6, 143.8, 153.6, 155.8 ppm.

HRMS (ESI<sup>+</sup>):  $m/z$  calcd for C<sub>30</sub>H<sub>21</sub>N<sub>2</sub> [M+H]<sup>+</sup>: 409.16993; found: 409.17038.



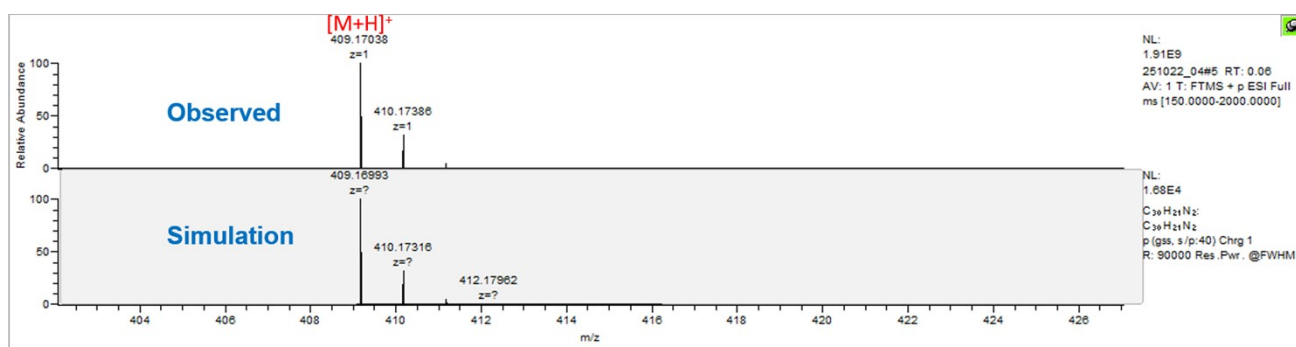

**Figure S3.** Mass spectra (ESI) and data of **1**. Top: experimental spectrum and bottom: theoretical spectrum.

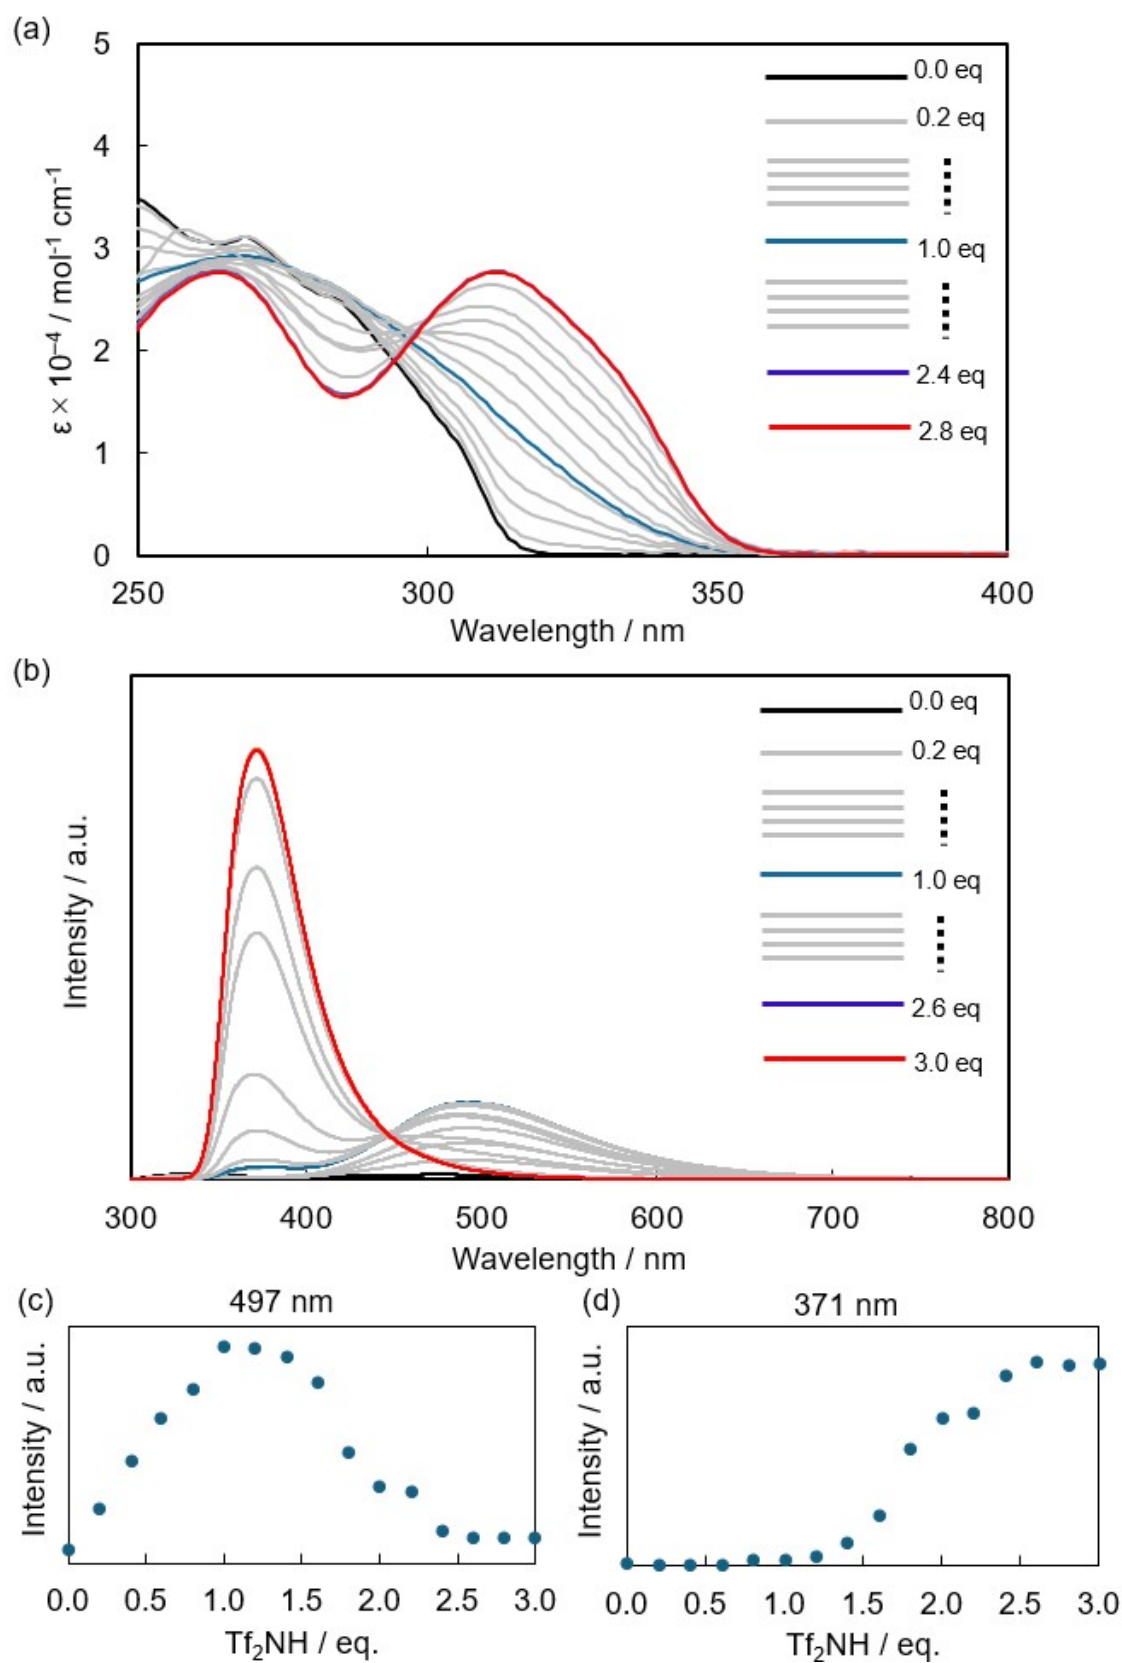

**Figure S4.** Spectral changes of (a) UV/vis absorption, (b) fluorescence spectra of **1** on the addition of  $\text{Tf}_2\text{NH}$  ( $5.0 \times 10^{-6}$  M,  $\text{CH}_2\text{Cl}_2$ ). (c,d) Fluorescence intensity plots for the acid titration at (c) 497 nm and (d) 371 nm.

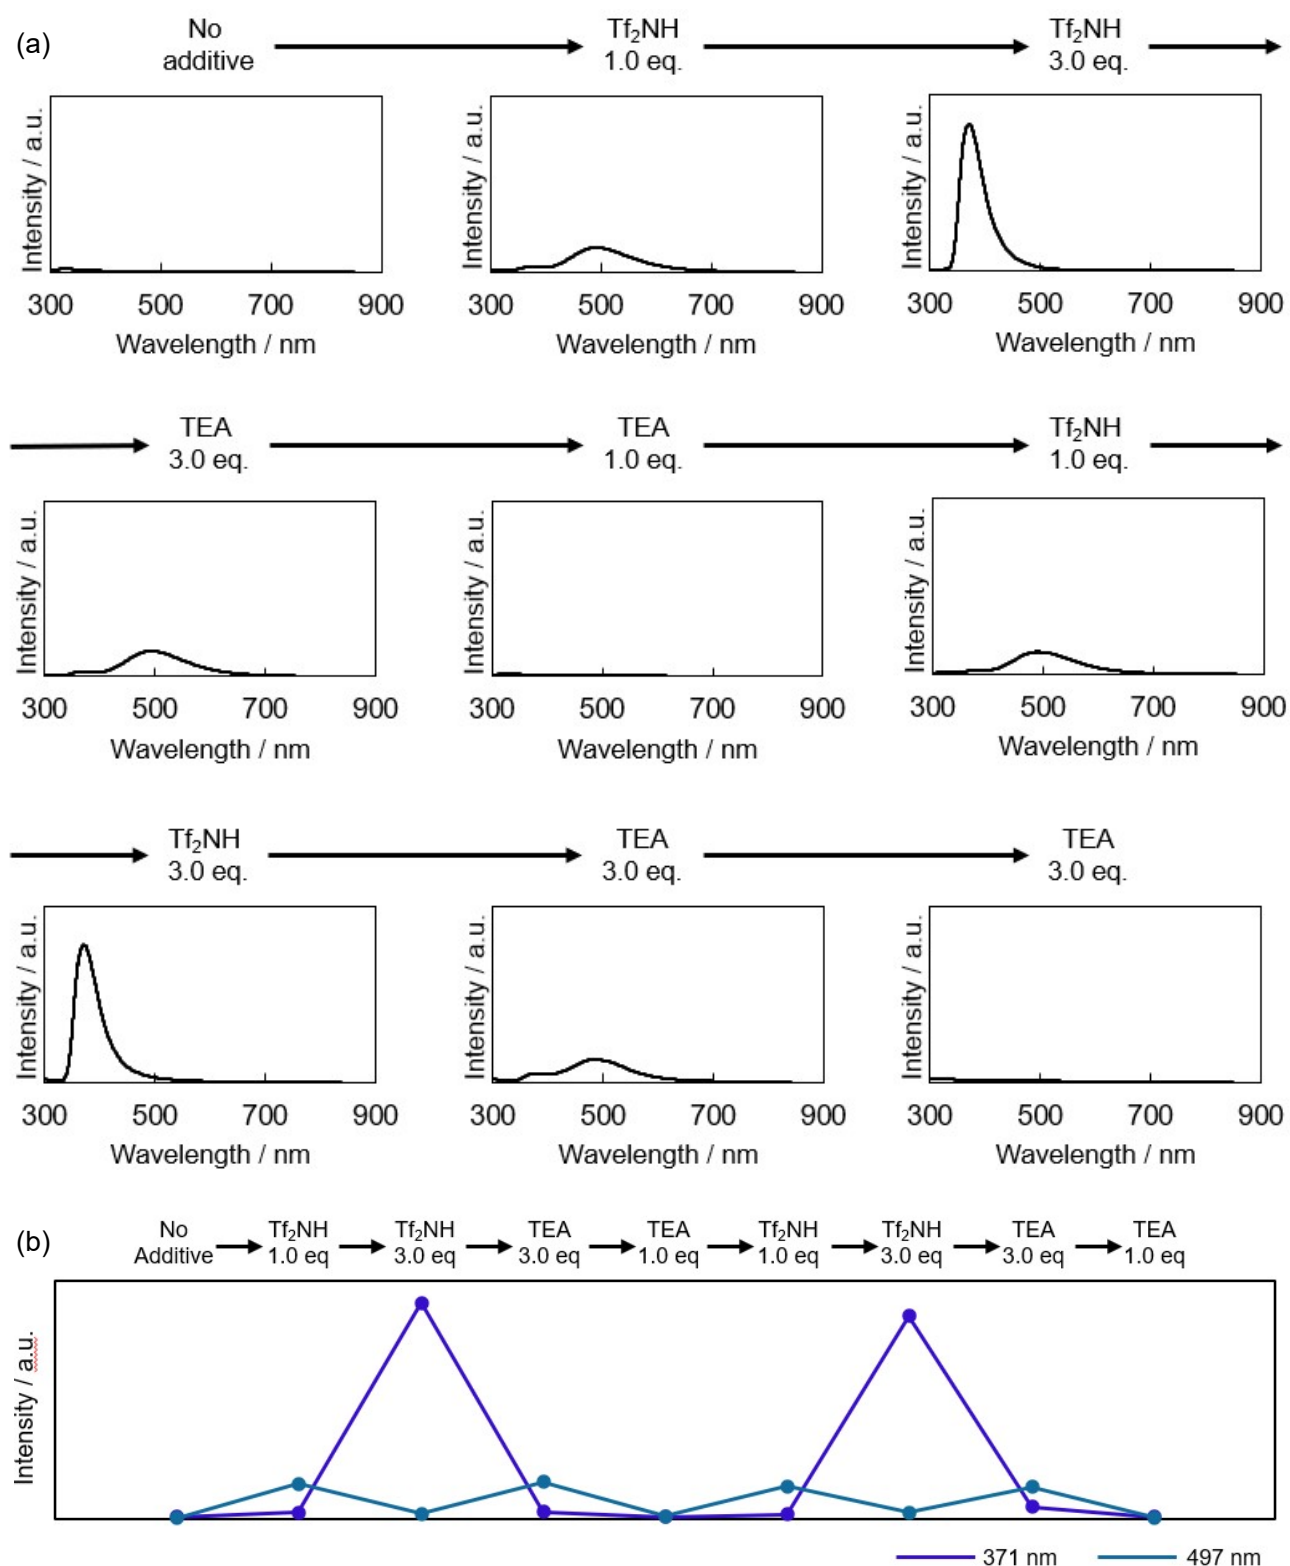

**Figure S5.** (a) PL spectral changes of **1** upon the addition of  $\text{Tf}_2\text{NH}$  and TEA. To a solution of **1** in  $\text{CH}_2\text{Cl}_2$  ( $5.0 \times 10^{-6}$  M, 3.0 mL) was added a  $\text{CH}_2\text{Cl}_2$  solution of  $\text{Tf}_2\text{NH}$  ( $5.0 \times 10^{-4}$  M) and a  $\text{CH}_2\text{Cl}_2$  solution of TEA ( $3.8 \times 10^{-4}$  M). (b) Switching of the emission intensity of **1** upon addition of  $\text{Tf}_2\text{NH}$  and TEA at 371 nm and 497 nm.

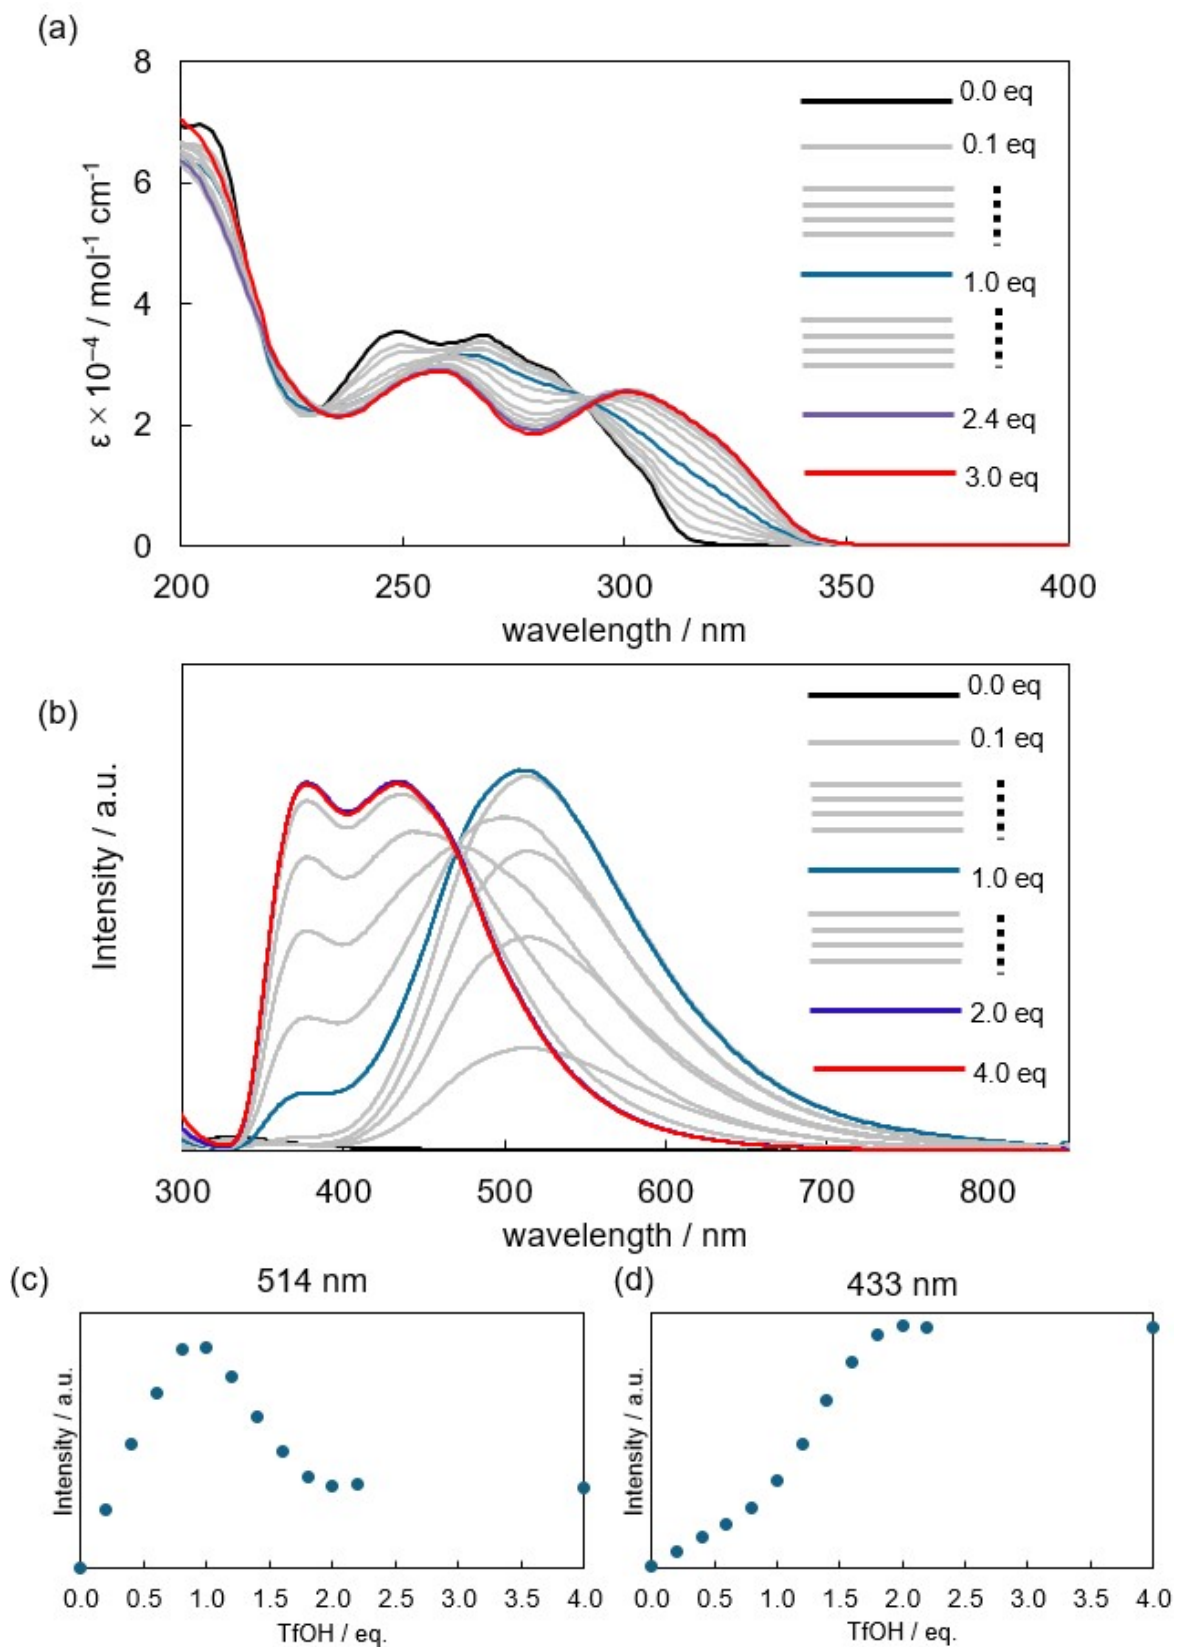

**Figure S6.** Spectral changes of (a) UV/vis absorption, (b) fluorescence spectra of **1** on the addition of TfOH ( $2.0 \times 10^{-5}$  M, MeCN). (c,d) Fluorescence intensity plots for the acid titration at (c) 514 nm and (d) 433 nm.

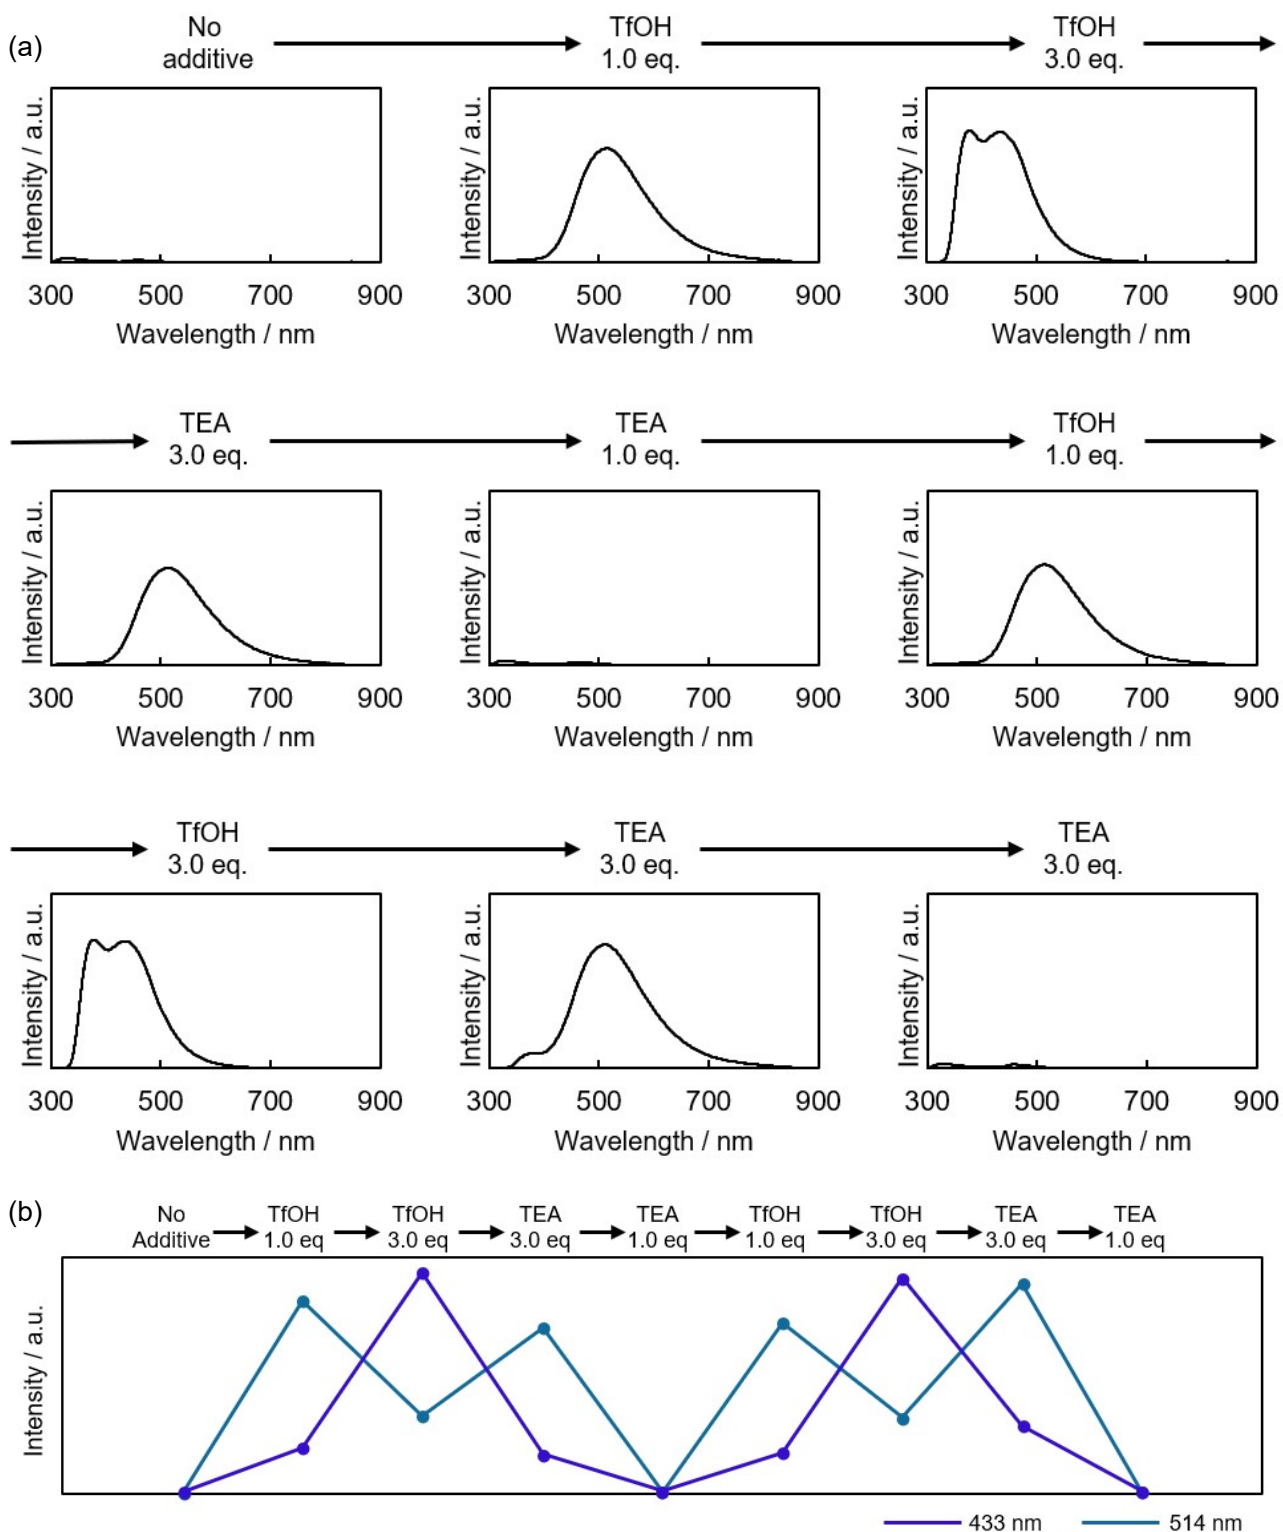

**Figure S7.** (a) PL spectral changes of **1** upon the addition of TfOH and TEA. To a solution of **1** in MeCN ( $2.0 \times 10^{-5}$  M, 3.0 mL) was added a CH<sub>3</sub>CN solution of TfOH ( $2.3 \times 10^{-3}$  M) and a CH<sub>3</sub>CN solution of TEA ( $1.6 \times 10^{-3}$  M). (b) Switching of the emission intensity of **1** upon addition of TfOH and TEA at 371 nm and 497 nm.

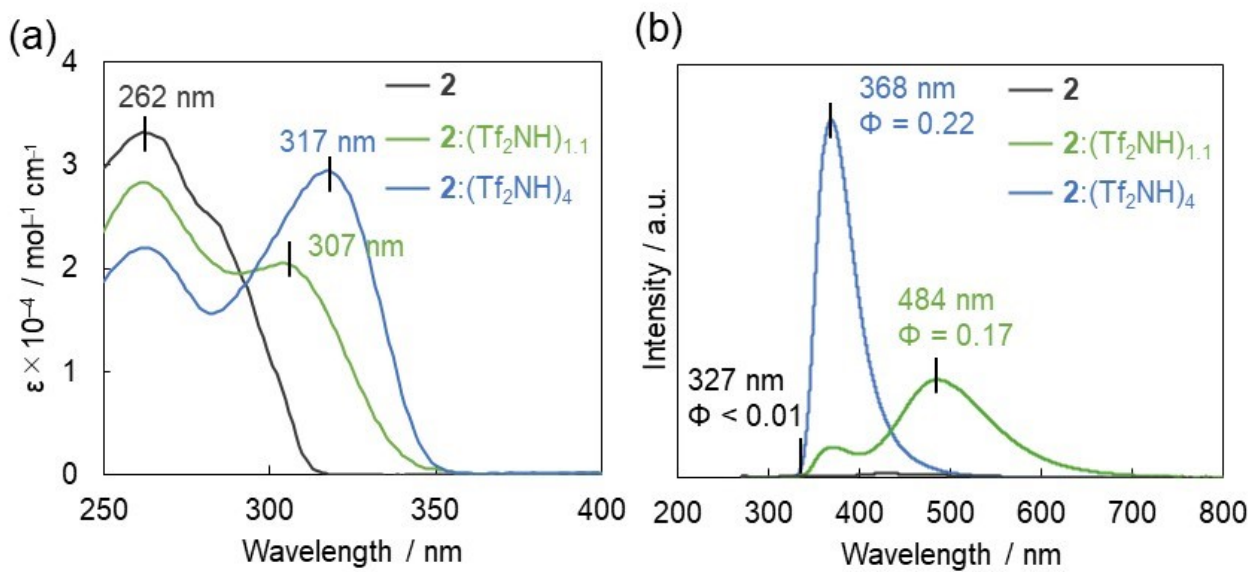

**Figure S8.** Spectral changes in (a) UV/vis absorption, (b) fluorescence spectra of **2** on the addition of  $\text{Tf}_2\text{NH}$  ( $5.0 \times 10^{-6} \text{ M}$ ,  $\text{CH}_2\text{Cl}_2$ ).

(a) 1.1 eq. of Tf<sub>2</sub>NH in CH<sub>2</sub>Cl<sub>2</sub>

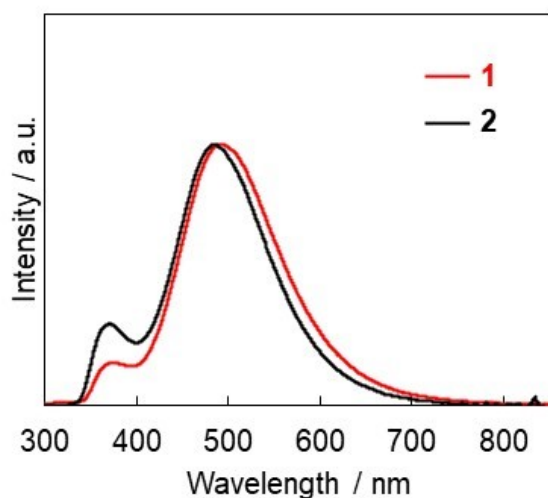

(b) 4.0 eq. of Tf<sub>2</sub>NH in CH<sub>2</sub>Cl<sub>2</sub>

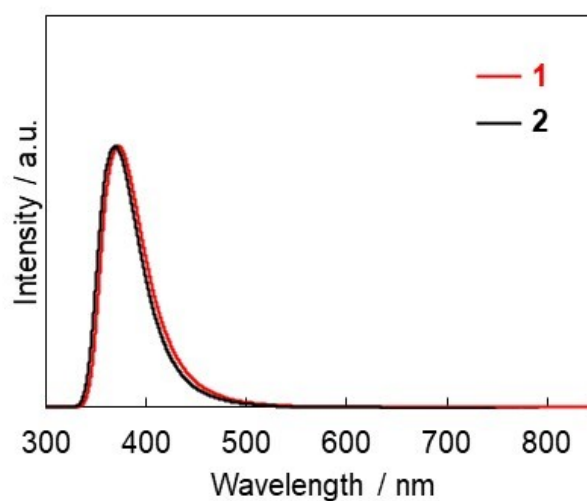

(c) 1.1 eq. of TfOH in MeCN

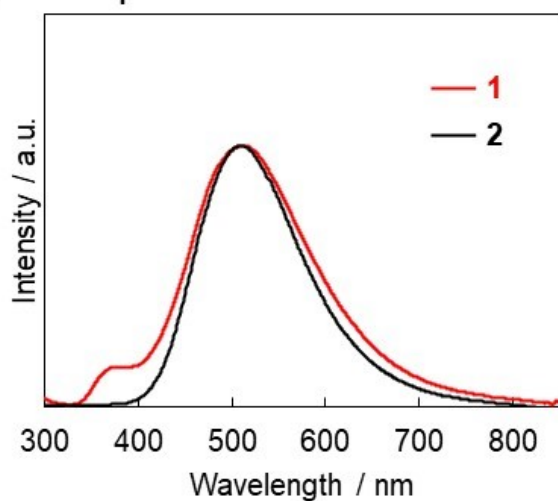

(d) 4.0 eq. of TfOH in MeCN

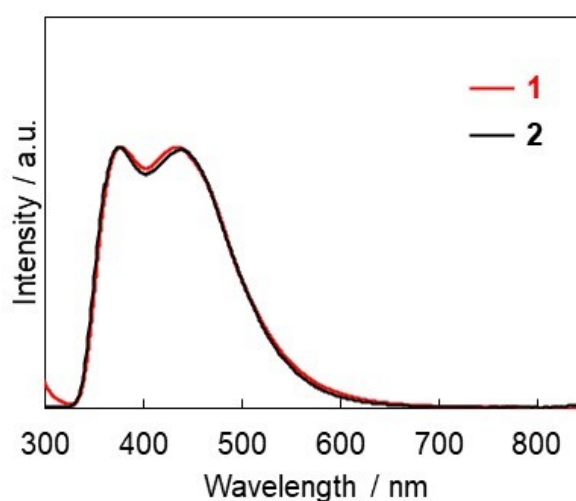

**Figure S9.** PL spectra of **1** and **2** under protonated conditions: (a) in the presence of 1.1 eq. of Tf<sub>2</sub>NH in CH<sub>2</sub>Cl<sub>2</sub>, (b) in the presence of 4.0 eq. of Tf<sub>2</sub>NH in CH<sub>2</sub>Cl<sub>2</sub>, (c) in the presence of 1.1 equiv. of TfOH in MeCN, and (d) in the presence of 4.0 eq. of TfOH in MeCN.

**Table S1.** Photophysical data for **1** and **2**.<sup>[a,c]</sup>

| Compound                                                    | Solution                        | $\lambda_{\text{abs,max}}$ [nm]<br>( $\epsilon \times 10^4 / \text{M}^{-1}\text{cm}^{-1}$ ) | $\lambda_{\text{lum,max}}$<br>[nm] | $\Phi^{[c]}$ | $\tau$ [ns] ( $\chi^2$ ) | $k_r$<br>[ $10^7 \text{ s}^{-1}$ ] | $k_{\text{nr}}$<br>[ $10^7 \text{ s}^{-1}$ ] |
|-------------------------------------------------------------|---------------------------------|---------------------------------------------------------------------------------------------|------------------------------------|--------------|--------------------------|------------------------------------|----------------------------------------------|
| <b>1</b>                                                    | CH <sub>2</sub> Cl <sub>2</sub> | 269 (3.06)                                                                                  | 330                                | <0.01        | -                        | -                                  | -                                            |
| <b>1</b> :(Tf <sub>2</sub> NH) <sub>1.1</sub>               | CH <sub>2</sub> Cl <sub>2</sub> | 269 (2.93)                                                                                  | 497                                | 0.03         | 12.4 (1.0)               | 0.24                               | 7.8                                          |
| <b>1</b> :(Tf <sub>2</sub> NH) <sub>4.0</sub>               | CH <sub>2</sub> Cl <sub>2</sub> | 310 (2.79)                                                                                  | 371                                | 0.07         | 1.67 (1.0)               | 4.2                                | 55.7                                         |
| <b>1</b>                                                    | MeCN                            | 268 (3.48)                                                                                  | 329                                | <0.01        | -                        | -                                  | -                                            |
| <b>1</b> :(TfOH) <sub>1.1</sub>                             | MeCN                            | 264 (3.16)                                                                                  | 514                                | 0.03         | -                        | -                                  | -                                            |
| <b>1</b> :(TfOH) <sub>4.0</sub>                             | MeCN                            | 310 (2.31)                                                                                  | 433                                | 0.03         | -                        | -                                  | -                                            |
| (9 <i>S</i> ,10 <i>S</i> )- <b>2</b>                        | CH <sub>2</sub> Cl <sub>2</sub> | 262 (3.32)                                                                                  | 327                                | <0.01        | -                        | -                                  | -                                            |
| (9 <i>S</i> ,10 <i>S</i> )- <b>2</b> :(TfOH) <sub>1.1</sub> | CH <sub>2</sub> Cl <sub>2</sub> | 307 (2.05)                                                                                  | 484                                | 0.17         | 10.7 (1.0)               | 1.6                                | 7.8                                          |
| (9 <i>S</i> ,10 <i>S</i> )- <b>2</b> :(TfOH) <sub>4.0</sub> | CH <sub>2</sub> Cl <sub>2</sub> | 317 (2.94)                                                                                  | 368                                | 0.22         | 2.23 (1.0)               | 9.9                                | 35.0                                         |
| (9 <i>S</i> ,10 <i>S</i> )- <b>2</b>                        | MeCN                            | 203 (8.60)                                                                                  | 416                                | < 0.01       | -                        | -                                  | -                                            |
| (9 <i>S</i> ,10 <i>S</i> )- <b>2</b> :(TfOH) <sub>1.1</sub> | MeCN                            | 204 (7.57)                                                                                  | 510                                | 0.12         | 11.9 (1.0)               | 1.0                                | 7.4                                          |
| (9 <i>S</i> ,10 <i>S</i> )- <b>2</b> :(TfOH) <sub>4.0</sub> | MeCN                            | 201 (6.59)                                                                                  | 438                                | 0.17         | 6.1 (1.0)                | 2.8                                | 13.5                                         |

[a] Emission spectra, quantum efficiencies, and emission decays were measured in CH<sub>2</sub>Cl<sub>2</sub> solution ( $5.0 \times 10^{-6}$  M) or MeCN solution ( $2.0 \times 10^{-5}$  M) at room temperature. [b] Determined by the absolute method using an integrating sphere. [c] Data of **2** in MeCN obtained from ref 12.

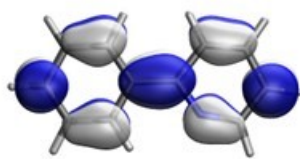

LUMO

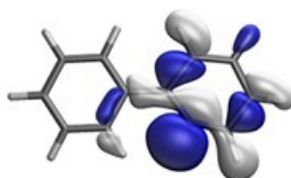

HOMO-1

$\lambda = 330 \text{ nm}$ ,  $f = 0.0006$   
n- $\pi^*$  transition

**Figure S10.** Selected molecular orbitals in the  $S_1$  states,  $\lambda$ , and oscillator strength  $f$  of ppy (TDA-TD-LC-wHPBE, 6-31g(d)).

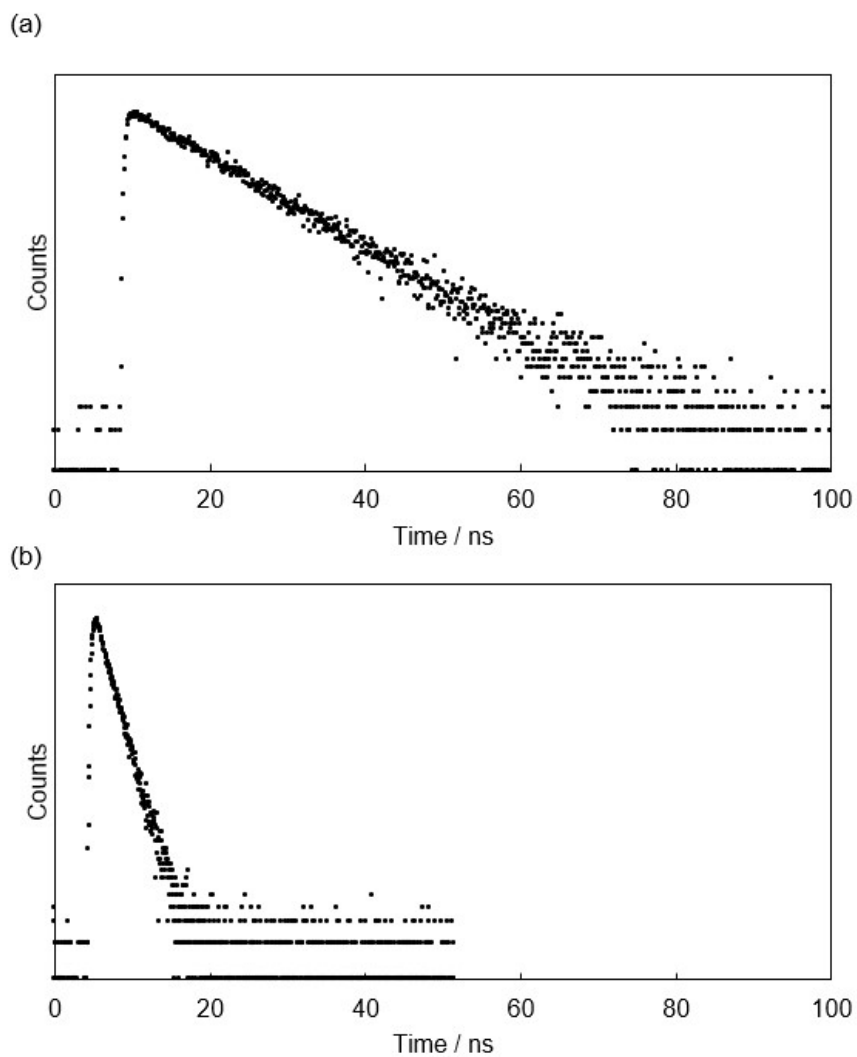

**Figure S11.** Emission decay curves for (a)  $1:(\text{Tf}_2\text{NH})_{1.1}$  and (b)  $1:(\text{Tf}_2\text{NH})_4$  in  $\text{CH}_2\text{Cl}_2$  ( $5.0 \times 10^{-6}$  M) monitored at (a) 497 nm (b) 410 nm ( $\lambda_{\text{ex}} = 280$  nm).

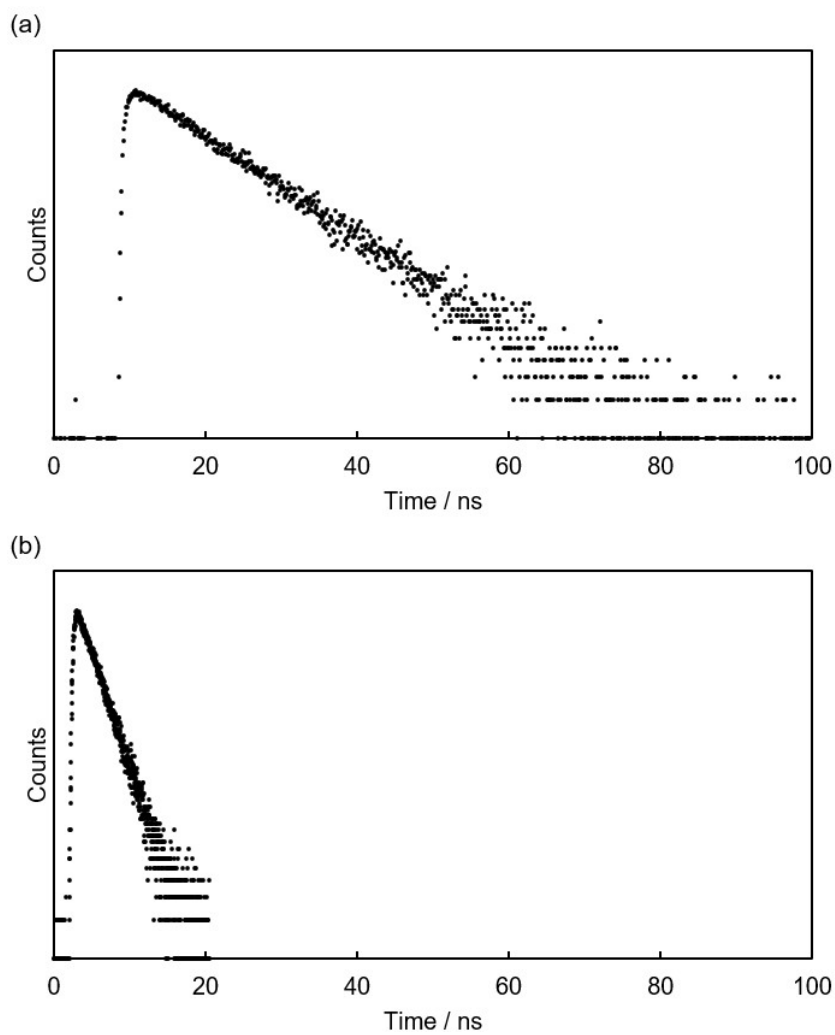

**Figure S12.** Emission decay curves for (a) **2**:(Tf<sub>2</sub>NH)<sub>1.1</sub> and (b) **2**:(Tf<sub>2</sub>NH)<sub>4</sub> in CH<sub>2</sub>Cl<sub>2</sub> (5.0×10<sup>-6</sup> M) monitored at (a) 490 nm (b) 400 nm ( $\lambda_{\text{ex}} = 280$  nm).

## Computational methods

TD-DFT calculations were carried out by using the Gaussian 16 program package, with the 6–31G(d) basis set for C, H, and N atoms. Optimized geometries, as well as molecular orbitals in the  $S_1$  states were determined by TD-DFT calculations with the LC-wHPBE functional with Tamm-Dancoff Approximation. Analysis of the molecular orbital pair contributions to the transition dipole moment was performed using Multiwfn.<sup>[30]</sup> Selected excited-state data together with Cartesian coordinates are provided in Table S8–S14.

### 1 (HOMO: 107, LUMO: 108)

|               |           |           |           |           |          |              |
|---------------|-----------|-----------|-----------|-----------|----------|--------------|
| Excited State | 1:        | Singlet-A | 3.8686 eV | 320.49 nm | f=0.0028 | <S**2>=0.000 |
|               | 105 ->108 | 0.56529   |           |           |          |              |
|               | 105 ->117 | -0.12999  |           |           |          |              |
|               | 106 ->108 | 0.29279   |           |           |          |              |

This state for optimization and/or second-order correction.

Total Energy, E(CIS/TDA) = -1263.66256885

### 1H<sup>+</sup> (HOMO: 107, LUMO:108)

|               |           |           |           |           |          |              |
|---------------|-----------|-----------|-----------|-----------|----------|--------------|
| Excited State | 1:        | Singlet-A | 3.8044 eV | 325.89 nm | f=0.0115 | <S**2>=0.000 |
|               | 101 ->108 | 0.13026   |           |           |          |              |
|               | 102 ->108 | 0.14586   |           |           |          |              |
|               | 105 ->108 | -0.15160  |           |           |          |              |
|               | 107 ->108 | 0.62792   |           |           |          |              |

This state for optimization and/or second-order correction.

Total Energy, E(CIS/TDA) = -1264.06893961

### 1H<sub>2</sub><sup>2+</sup> (HOMO: 107, LUMO:108)

|               |           |            |           |           |          |              |
|---------------|-----------|------------|-----------|-----------|----------|--------------|
| Excited State | 1:        | Singlet-A" | 4.2179 eV | 293.95 nm | f=0.9336 | <S**2>=0.000 |
|               | 100 ->108 | -0.10273   |           |           |          |              |
|               | 105 ->108 | 0.19494    |           |           |          |              |
|               | 106 ->109 | -0.41647   |           |           |          |              |
|               | 107 ->108 | 0.47385    |           |           |          |              |

This state for optimization and/or second-order correction.

Total Energy, E(CIS/TDA) = -1264.36977788

### ppy (HOMO: 41, LUMO: 42)

|               |          |           |           |           |          |              |
|---------------|----------|-----------|-----------|-----------|----------|--------------|
| Excited State | 1:       | Singlet-A | 3.7569 eV | 330.02 nm | f=0.0006 | <S**2>=0.000 |
|               | 40 -> 42 | 0.66958   |           |           |          |              |

40 -> 45            -0.19579

This state for optimization and/or second-order correction.

Total Energy, E(CIS/TDA) = -478.816413830

**2** (HOMO: 107, LUMO: 108)

|               |    |           |           |           |          |              |
|---------------|----|-----------|-----------|-----------|----------|--------------|
| Excited State | 1: | Singlet-A | 3.8606 eV | 321.15 nm | f=0.0026 | <S**2>=0.000 |
|               |    | 105 ->108 | 0.63162   |           |          |              |
|               |    | 105 ->117 | -0.14205  |           |          |              |
|               |    | 106 ->108 | -0.11889  |           |          |              |

This state for optimization and/or second-order correction.

Total Energy, E(CIS/TDA) = -1263.66269747

**2H<sup>+</sup>** (HOMO: 107, LUMO:108)

|               |    |           |           |           |          |              |
|---------------|----|-----------|-----------|-----------|----------|--------------|
| Excited State | 1: | Singlet-A | 3.7542 eV | 330.26 nm | f=0.3561 | <S**2>=0.000 |
|               |    | 101 ->108 | 0.19483   |           |          |              |
|               |    | 105 ->108 | 0.12305   |           |          |              |
|               |    | 107 ->108 | 0.62124   |           |          |              |
|               |    | 107 ->110 | 0.16091   |           |          |              |

This state for optimization and/or second-order correction.

Total Energy, E(CIS/TDA) = -1264.09310126

**2H<sub>2</sub><sup>2+</sup>** (HOMO: 107, LUMO:108)

|               |    |           |           |           |          |              |
|---------------|----|-----------|-----------|-----------|----------|--------------|
| Excited State | 1: | Singlet-A | 4.2525 eV | 291.56 nm | f=1.2480 | <S**2>=0.000 |
|               |    | 105 ->109 | 0.20208   |           |          |              |
|               |    | 106 ->108 | 0.50042   |           |          |              |
|               |    | 107 ->109 | -0.37364  |           |          |              |

This state for optimization and/or second-order correction.

Total Energy, E(CIS/TDA) = -1264.36936913

**Table S2.** Molecular orbital pair contributions to transition dipole moment of monocation  $1H^+$ .

| #Pair               | Orbital trans. | Coefficien<br>t | Transition dipole |           |           | Norm (a.u.) |
|---------------------|----------------|-----------------|-------------------|-----------|-----------|-------------|
|                     |                |                 | X/Y/Z             |           |           |             |
| 1                   | 101 -> 108     | 0.130570        | 0.119000          | 0.152870  | 0.077456  | 0.208637    |
| 2                   | 102 -> 108     | 0.145320        | -0.250011         | -0.265772 | -0.161117 | 0.398871    |
| 3                   | 105 -> 108     | -0.151570       | 0.065220          | 0.041781  | -0.052725 | 0.093697    |
| 4 (main transition) | 107 -> 108     | 0.627950        | -0.070100         | 0.146996  | -0.004665 | 0.162922    |

TDM of main transition (Pair 4)

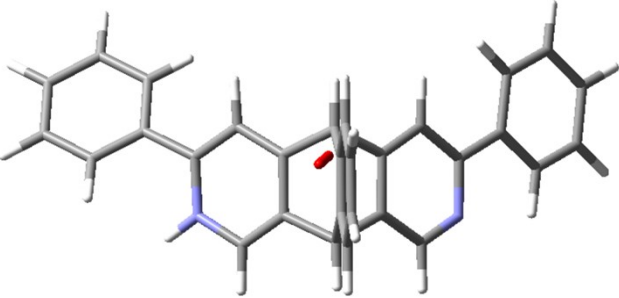**Table S3.** Molecular orbital pair contributions to transition dipole moment of monocation  $2H^+$ .

| #Pair               | Orbital trans. | Coefficien<br>t | Transition dipole |           |           | Norm (a.u.) |
|---------------------|----------------|-----------------|-------------------|-----------|-----------|-------------|
|                     |                |                 | X/Y/Z             |           |           |             |
| 1                   | 101 -> 108     | 0.194830        | 0.050109          | 0.064888  | 0.161371  | 0.181003    |
| 2                   | 105 -> 108     | 0.123050        | -0.042064         | -0.046469 | 0.045675  | 0.077556    |
| 3 (main transition) | 107 -> 108     | 0.621240        | 1.175564          | 0.332206  | 0.193506  | 1.236834    |
| 4                   | 107 -> 110     | 0.160910        | 0.560828          | 0.380724  | -0.134281 | 0.691021    |

TDM of main transition (Pair 3)

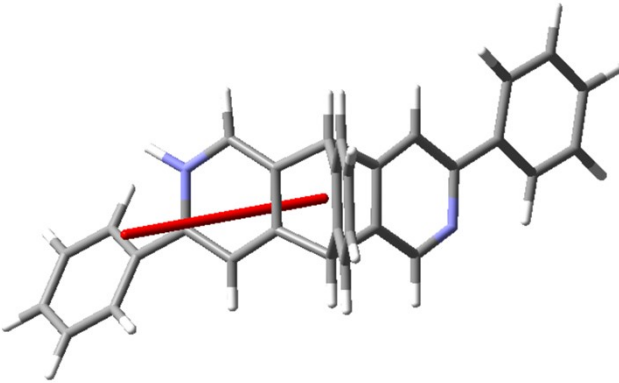

**Table S4.** Molecular orbital pair contributions to transition dipole moment of monocation  $1\text{H}_2^{2+}$ .

| #Pair               | Orbital trans. | Coefficien<br>t | Transition dipole |          |          | Norm (a.u.) |
|---------------------|----------------|-----------------|-------------------|----------|----------|-------------|
|                     |                |                 | X/Y/Z             |          |          |             |
| 1                   | 100 -> 108     | -0.103070       | 0.000000          | 0.000000 | 0.004339 | 0.004339    |
| 2                   | 105 -> 108     | 0.194990        | 0.000000          | 0.000000 | 0.378516 | 0.378516    |
| 3                   | 106 -> 109     | 0.416310        | 0.000000          | 0.000000 | 1.345696 | 1.345696    |
| 4 (main transition) | 107 -> 108     | 0.473880        | 0.000000          | 0.000000 | 0.991690 | 0.991690    |

TDM of main transition (Pair 4)

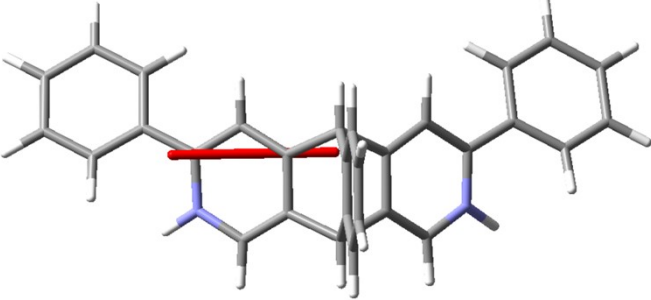
**Table S5.** Molecular orbital pair contributions to transition dipole moment of monocation  $2\text{H}_2^{2+}$ .

| #Pair               | Orbital trans. | Coefficien<br>t | Transition dipole |           |           | Norm (a.u.) |
|---------------------|----------------|-----------------|-------------------|-----------|-----------|-------------|
|                     |                |                 | X/Y/Z             |           |           |             |
| 1                   | 105 -> 109     | 0.202080        | 0.460487          | 0.000000  | -0.143208 | 0.482241    |
| 2 (main transition) | 106 -> 108     | 0.500420        | 1.979468          | 0.000004  | -0.501775 | 2.042075    |
| 3                   | 107 -> 109     | -0.373640       | 0.676063          | -0.000005 | -0.452843 | 0.813712    |

TDM of main transition (Pair 2)

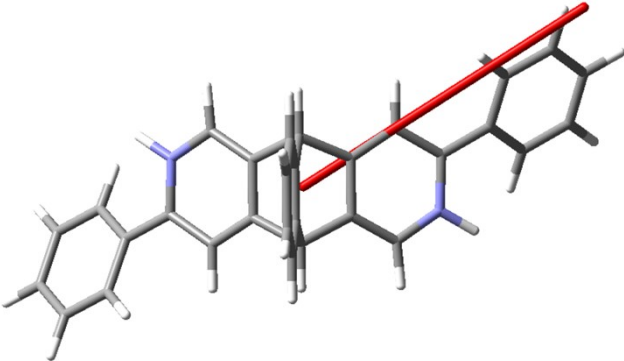

**Table S6.** Crystallographic data and structure refinements.

| Molecule                                                                   | <b>1</b>                                       | <b>1</b> •TfOH•EtOH•H <sub>2</sub> O                                           | <b>1</b> •(TfOH) <sub>2</sub> •(H <sub>2</sub> O) <sub>2.5</sub>                             |
|----------------------------------------------------------------------------|------------------------------------------------|--------------------------------------------------------------------------------|----------------------------------------------------------------------------------------------|
| Formula                                                                    | C <sub>30</sub> H <sub>20</sub> N <sub>2</sub> | C <sub>33</sub> H <sub>29</sub> F <sub>3</sub> N <sub>2</sub> O <sub>5</sub> S | C <sub>37</sub> H <sub>28</sub> F <sub>12</sub> N <sub>4</sub> O <sub>9</sub> S <sub>4</sub> |
| Formula weight                                                             | 408.48                                         | 622.64                                                                         | 1028.87                                                                                      |
| Temperature (K)                                                            | 150                                            | 150                                                                            | 150                                                                                          |
| Crystal color, habit                                                       | colorless, plate                               | yellow, plate                                                                  | colorless, plate                                                                             |
| Crystal size, mm                                                           | 0.1 × 0.1 × 0.03                               | 0.5 × 0.3 × 0.02                                                               | 0.2 × 0.2 × 0.05                                                                             |
| Crystal system                                                             | triclinic                                      | orthorhombic                                                                   | triclinic                                                                                    |
| Space group                                                                | <i>P</i> $\bar{1}$ (#2)                        | <i>Pbca</i> (#61)                                                              | <i>P</i> $\bar{1}$ (#2)                                                                      |
| <i>a</i> , Å                                                               | 11.5316(3)                                     | 13.7158(4)                                                                     | 11.6575(3)                                                                                   |
| <i>b</i> , Å                                                               | 12.1045(4)                                     | 19.9625(6)                                                                     | 13.2664(4)                                                                                   |
| <i>c</i> , Å                                                               | 15.9135(5)                                     | 21.2858(7)                                                                     | 14.5139(5)                                                                                   |
| $\alpha$ , deg                                                             | 97.883(3)                                      | 90                                                                             | 86.097(2)                                                                                    |
| $\beta$ , deg                                                              | 105.717(3)                                     | 90                                                                             | 81.085(2)                                                                                    |
| $\gamma$ , deg                                                             | 104.068(3)                                     | 90                                                                             | 74.851(2)                                                                                    |
| <i>V</i> , Å <sup>3</sup>                                                  | 2024.48(11)                                    | 5828.1(3)                                                                      | 2139.55(11)                                                                                  |
| <i>Z</i> value                                                             | 4                                              | 8                                                                              | 2                                                                                            |
| <i>D</i> <sub>calcd</sub> , g cm <sup>-3</sup>                             | 1.340                                          | 1.419                                                                          | 1.597                                                                                        |
| $\mu$ (MoK $\alpha$ ), cm <sup>-1</sup>                                    | 0.78                                           | 1.76                                                                           | 3.33                                                                                         |
| <i>F</i> (000)                                                             | 856.0                                          | 2592.0                                                                         | 1044.0                                                                                       |
| 2 $\theta$ <sub>max</sub> , deg                                            | 56.406                                         | 56.670                                                                         | 56.314                                                                                       |
| No. of reflections measured                                                | 18321                                          | 29903                                                                          | 17967                                                                                        |
| No. of observed reflections                                                | 7992                                           | 6341                                                                           | 8339                                                                                         |
| No. of variables                                                           | 6633                                           | 5311                                                                           | 7468                                                                                         |
| <i>R</i> <sub>1</sub> ( <i>I</i> > 2 $\sigma$ ( <i>I</i> )) <sup>[a]</sup> | 0.0397                                         | 0.0403                                                                         | 0.0841                                                                                       |
| w <i>R</i> <sub>2</sub> (all reflns) <sup>[b]</sup>                        | 0.1028                                         | 0.1030                                                                         | 0.2472                                                                                       |
| Goodness of fit                                                            | 1.013                                          | 1.067                                                                          | 1.021                                                                                        |
| Radiation_type                                                             | MoK $\alpha$                                   | MoK $\alpha$                                                                   | MoK $\alpha$                                                                                 |
| Recrystallization solvent                                                  | CH <sub>2</sub> Cl <sub>2</sub> , MeOH         | EtOH, CHCl <sub>3</sub>                                                        | Acetone, CH <sub>2</sub> Cl <sub>2</sub>                                                     |
| CCDC-number                                                                | 2498092                                        | 2498093                                                                        | 2498094                                                                                      |

[a]  $R_1 = \Sigma(|F_o| - |F_c|) / \Sigma(|F_o|)$ . [b]  $wR_2 = [\Sigma[w(F_o^2 - F_c^2)^2] / \Sigma w(F_o^2)^2]^{1/2}$ .

**Table S6.** Continued.

| Molecule                                                                   | <b>1</b> •(Tf <sub>2</sub> NH) <sub>2</sub> •Acetone                                         | <b>1</b> •(Tf <sub>2</sub> NH) <sub>2</sub> •EtOH                                            | <b>1</b> •(HBr) <sub>2</sub> •(H <sub>2</sub> O) <sub>2</sub>                 |
|----------------------------------------------------------------------------|----------------------------------------------------------------------------------------------|----------------------------------------------------------------------------------------------|-------------------------------------------------------------------------------|
| Formula                                                                    | C <sub>37</sub> H <sub>28</sub> F <sub>12</sub> N <sub>4</sub> O <sub>9</sub> S <sub>4</sub> | C <sub>36</sub> H <sub>26</sub> F <sub>12</sub> N <sub>4</sub> O <sub>9</sub> S <sub>4</sub> | C <sub>30</sub> H <sub>24</sub> Br <sub>2</sub> N <sub>2</sub> O <sub>2</sub> |
| Formula weight                                                             | 1028.87                                                                                      | 1014.85                                                                                      | 604.33                                                                        |
| Temperature (K)                                                            | 150                                                                                          | 150                                                                                          | 150                                                                           |
| Crystal color, habit                                                       | colorless, plate                                                                             | colorless, block                                                                             | colorless, block                                                              |
| Crystal size, mm                                                           | 0.2 × 0.2 × 0.05                                                                             | 0.1 × 0.1 × 0.08                                                                             | 0.4 × 0.2 × 0.2                                                               |
| Crystal system                                                             | triclinic                                                                                    | monoclinic                                                                                   | monoclinic                                                                    |
| Space group                                                                | <i>P</i> $\bar{1}$ (#2)                                                                      | <i>P</i> 2 <sub>1</sub> (#4)                                                                 | <i>P</i> 2 <sub>1</sub> /c (#14)                                              |
| <i>a</i> , Å                                                               | 11.6575(3)                                                                                   | 13.2970(4)                                                                                   | 8.1489(3)                                                                     |
| <i>b</i> , Å                                                               | 13.2664(4)                                                                                   | 21.4099(7)                                                                                   | 18.9495(7)                                                                    |
| <i>c</i> , Å                                                               | 14.5139(5)                                                                                   | 14.5936(4)                                                                                   | 17.1033(6)                                                                    |
| $\alpha$ , deg                                                             | 86.097(2)                                                                                    | 90                                                                                           | 90                                                                            |
| $\beta$ , deg                                                              | 81.085(2)                                                                                    | 92.730(3)                                                                                    | 90.103(3)                                                                     |
| $\gamma$ , deg                                                             | 74.851(2)                                                                                    | 90                                                                                           | 90                                                                            |
| <i>V</i> , Å <sup>3</sup>                                                  | 2139.55(11)                                                                                  | 4149.9(2)                                                                                    | 2641.05(17)                                                                   |
| <i>Z</i> value                                                             | 2                                                                                            | 2                                                                                            | 4                                                                             |
| <i>D</i> <sub>calcd</sub> , g cm <sup>-3</sup>                             | 1.597                                                                                        | 1.624                                                                                        | 1.520                                                                         |
| $\mu$ (MoK $\alpha$ ), cm <sup>-1</sup>                                    | 3.33                                                                                         | 3.42                                                                                         | 31.0                                                                          |
| <i>F</i> (000)                                                             | 1044.0                                                                                       | 2056.0                                                                                       | 1216.0                                                                        |
| 2 $\theta$ <sub>max</sub> , deg                                            | 56.314                                                                                       | 56.532                                                                                       | 56.614                                                                        |
| No. of reflections measured                                                | 17967                                                                                        | 37484                                                                                        | 11870                                                                         |
| No. of observed reflections                                                | 8339                                                                                         | 15952                                                                                        | 5266                                                                          |
| No. of variables                                                           | 7468                                                                                         | 13424                                                                                        | 4431                                                                          |
| <i>R</i> <sub>1</sub> ( <i>I</i> > 2 $\sigma$ ( <i>I</i> )) <sup>[a]</sup> | 0.0841                                                                                       | 0.0537                                                                                       | 0.0380                                                                        |
| <i>wR</i> <sub>2</sub> (all reflns) <sup>[b]</sup>                         | 0.2472                                                                                       | 0.1364                                                                                       | 0.1152                                                                        |
| Goodness of fit                                                            | 1.021                                                                                        | 1.045                                                                                        | 1.047                                                                         |
| Radiation_type                                                             | MoK $\alpha$                                                                                 | MoK $\alpha$                                                                                 | MoK $\alpha$                                                                  |
| Recrystallization solvent                                                  | Acetone, CH <sub>2</sub> Cl <sub>2</sub>                                                     | EtOH                                                                                         | MeOH, THF, H <sub>2</sub> O, HBr                                              |
| CCDC-number                                                                | 2498095                                                                                      | 2498096                                                                                      | 2498097                                                                       |

[a]  $R_1 = \Sigma(|F_o| - |F_c|) / \Sigma(|F_o|)$ . [b]  $wR_2 = [\Sigma[w(F_o^2 - F_c^2)^2] / \Sigma w(F_o^2)]^{1/2}$ .

(a) **1**

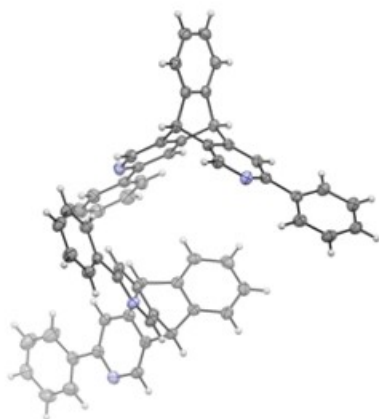

(b) **1**•TfOH•EtOH•H<sub>2</sub>O

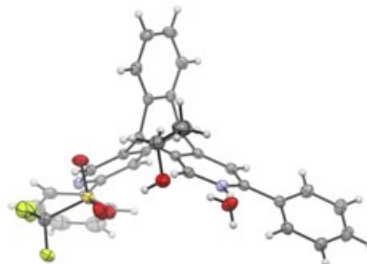

(c) **1**•(TfOH)<sub>2</sub>•(H<sub>2</sub>O)<sub>2.5</sub>

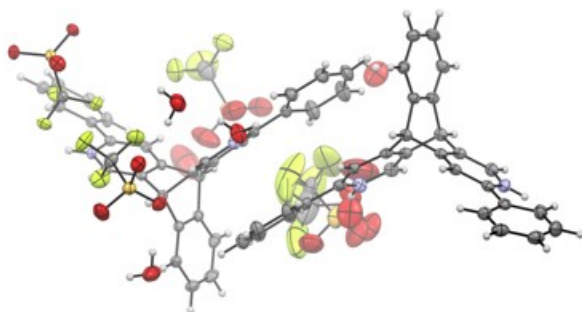

(d) **1**•(Tf<sub>2</sub>NH)<sub>2</sub>•Acetone

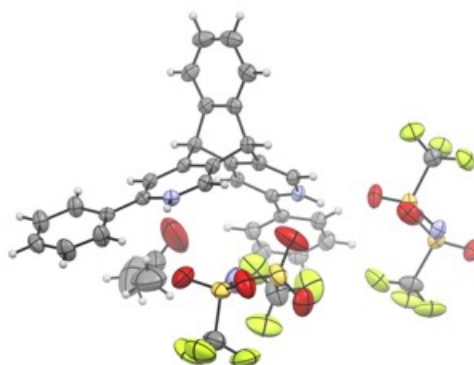

(e) **1**•(Tf<sub>2</sub>NH)<sub>2</sub>•EtOH

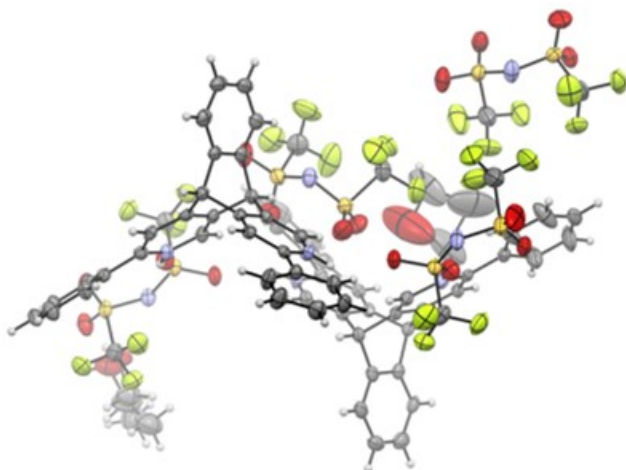

(e) **1**•(HBr)<sub>2</sub>•(H<sub>2</sub>O)<sub>2</sub>

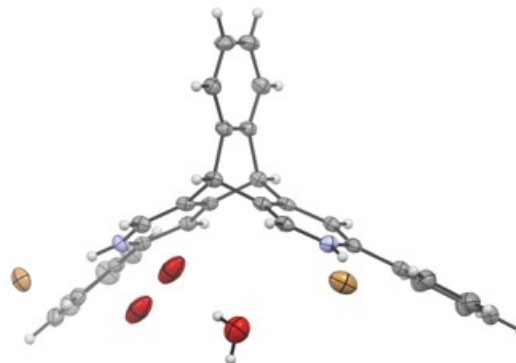

**Figure S13.** ORTEP drawing of (a) **1**, (b) **1**•TfOH•EtOH•H<sub>2</sub>O, (c) **1**•(TfOH)<sub>2</sub>•(H<sub>2</sub>O)<sub>2.5</sub>, (d) **1**•(Tf<sub>2</sub>NH)<sub>2</sub>•Acetone, (e) **1**•(Tf<sub>2</sub>NH)<sub>2</sub>•EtOH, and (f) **1**•(HBr)<sub>2</sub>•(H<sub>2</sub>O)<sub>2</sub>. Thermal ellipsoids are drawn at the 50% probability level. C: gray, H: off-white, N: blue, O: red, F: yellow-green, and S: yellow.

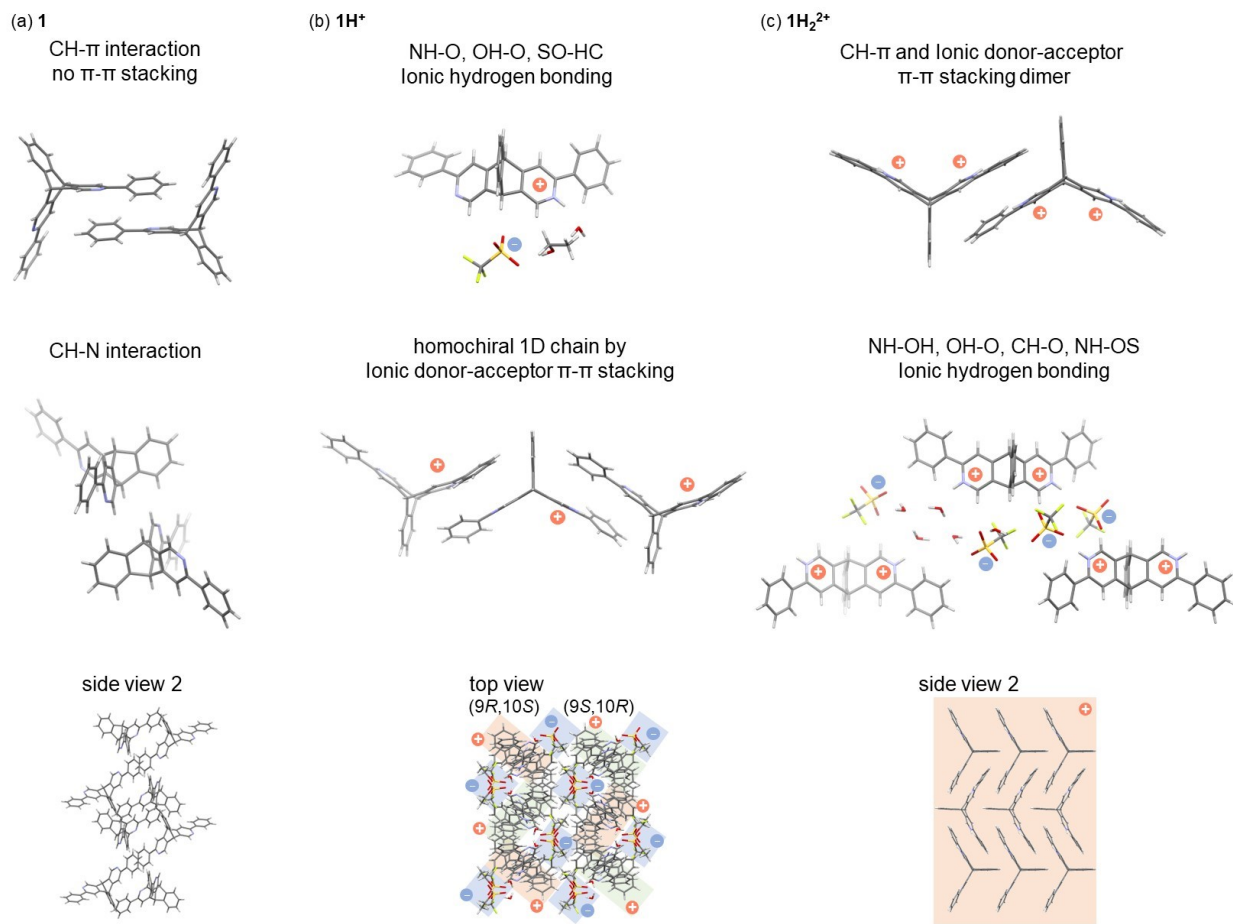

**Figure S14.** Selected intermolecular interactions and packing structures for (a) **1**, (b) **1**•TfOH•EtOH•H<sub>2</sub>O, and (c) **1**•(TfOH)<sub>2</sub>•(H<sub>2</sub>O)<sub>2.5</sub> in crystalline state.

(a)  $1 \cdot (\text{Tf}_2\text{NH})_2 \cdot \text{Acetone}$

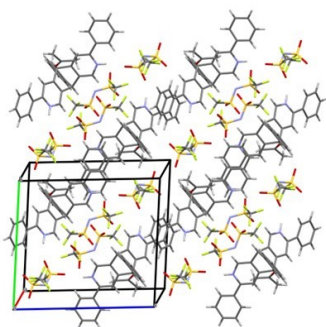

(b)  $1 \cdot \text{Tf}_2\text{NH} \cdot \text{EtOH}$

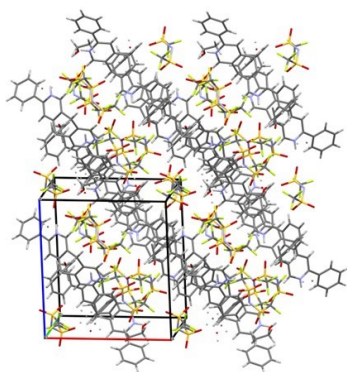

(c)  $1 \cdot (\text{HBr})_2 \cdot (\text{H}_2\text{O})_2$

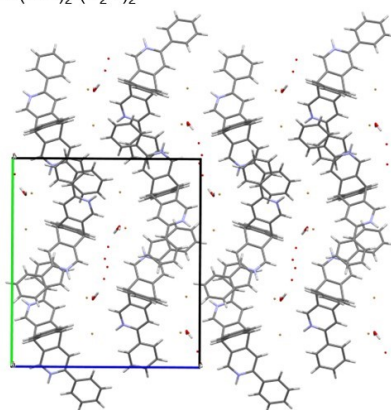

**Figure S15.** Crystal packing structures for (a)  $1 \cdot (\text{Tf}_2\text{NH})_2 \cdot \text{Acetone}$ , (b)  $1 \cdot (\text{Tf}_2\text{NH})_2 \cdot \text{EtOH}$ , and (c)  $1 \cdot (\text{HBr})_2 \cdot (\text{H}_2\text{O})_2$ .

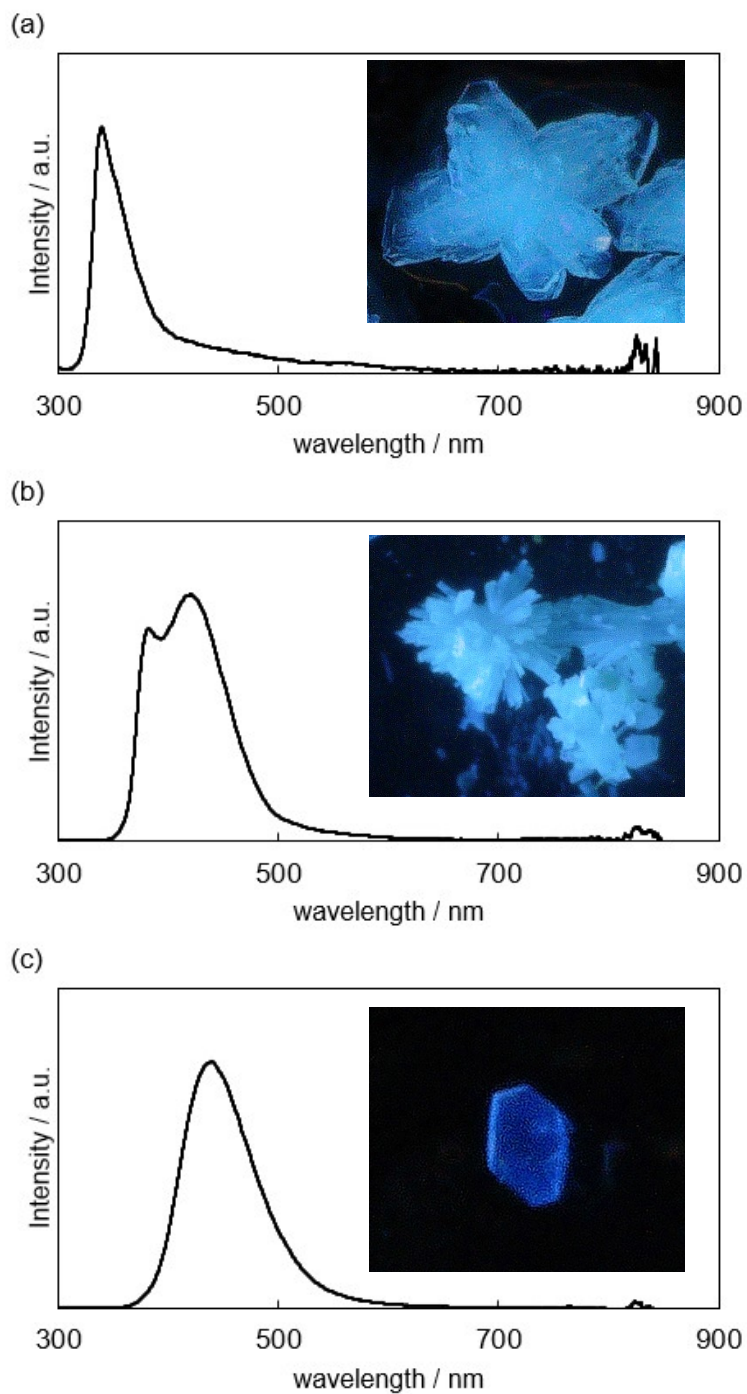

**Figure S16.** PL spectra charts of (a) **1**, (b) **1**·TfOH·EtOH·H<sub>2</sub>O and (c) **1**·(TfOH)<sub>2</sub>·(H<sub>2</sub>O)<sub>2.5</sub> in crystalline state. The inset photograph shows fluorescence from crystals under UV light.

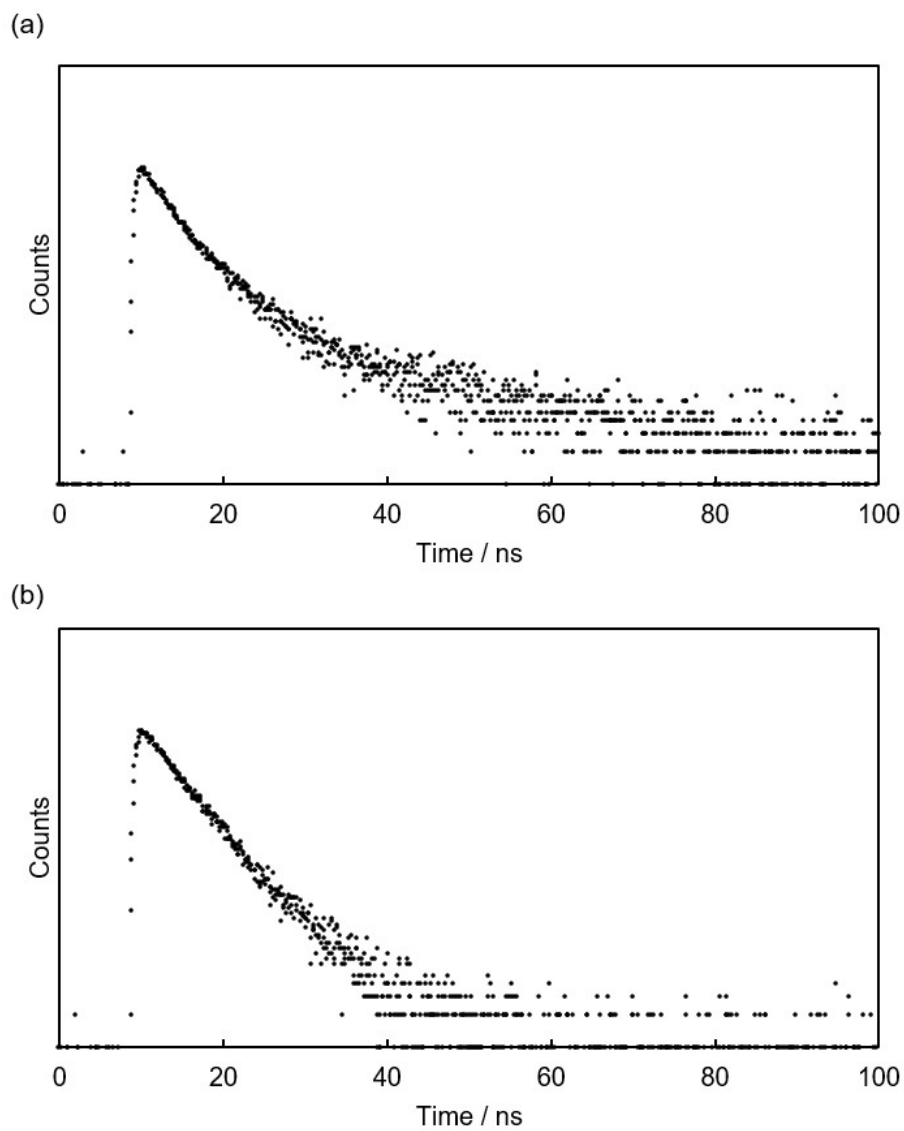

**Figure S17.** Emission decay curves for (a)  $1 \cdot \text{TfOH} \cdot \text{EtOH} \cdot \text{H}_2\text{O}$  and (b)  $1 \cdot (\text{TfOH})_2 \cdot (\text{H}_2\text{O})_{2.5}$  in crystalline state monitored at (a) 455 nm and (b) 500 nm ( $\lambda_{\text{ex}} = 280$  nm).

**Table S7.** Photophysical data for **1** in crystalline state. <sup>[a]</sup>

| Compound                                                         | $\lambda_{\text{lum,max}}$ [nm] | $\Phi$ <sup>[b]</sup> | $\tau$ [ns] ( $\chi^2$ ) |
|------------------------------------------------------------------|---------------------------------|-----------------------|--------------------------|
| <b>1</b>                                                         | 339                             | 0.08                  | -                        |
| <b>1</b> •TfOH•EtOH•H <sub>2</sub> O                             | 420                             | 0.37                  | 3.9, 15.2 (1.0)          |
| <b>1</b> •(TfOH) <sub>2</sub> •(H <sub>2</sub> O) <sub>2.5</sub> | 439                             | 0.25                  | 4.4 (1.0)                |

[a] Emission spectra, quantum efficiencies, and emission decays were measured at room temperature.

[b] Determined by the absolute method using an integrating sphere.

**Table S8.** Cartesian coordinates of **1** in the S<sub>1</sub> state (TDA-TD-LC-wHPBE, 6-31g(d)).

| Atom | X         | Y         | Z         |
|------|-----------|-----------|-----------|
| C    | -0.050765 | 2.996312  | -0.248730 |
| C    | -0.029586 | 2.425047  | 1.026931  |
| C    | -0.003192 | 3.228067  | 2.150722  |
| C    | -0.002164 | 4.612915  | 2.001861  |
| C    | -0.024329 | 5.179623  | 0.737349  |
| C    | -0.047642 | 4.370171  | -0.395838 |
| H    | 0.015190  | 2.783230  | 3.142263  |
| H    | 0.015316  | 5.249436  | 2.881544  |
| H    | -0.024251 | 6.260113  | 0.627591  |
| H    | -0.064669 | 4.815390  | -1.387297 |
| C    | 2.193443  | -0.303511 | 0.601603  |
| C    | 1.186483  | 0.499081  | 0.200171  |
| C    | 1.153464  | 1.095751  | -1.115900 |
| C    | 2.208805  | 0.804446  | -1.941180 |
| H    | 2.206522  | -0.747099 | 1.592569  |
| H    | 2.331166  | 1.177069  | -2.954836 |
| C    | -3.268338 | -0.623076 | -0.366664 |
| C    | -2.244663 | -0.364043 | 0.553435  |
| C    | -1.227463 | 0.486763  | 0.182711  |
| C    | -1.248735 | 1.062968  | -1.087856 |
| C    | -2.306367 | 0.762705  | -1.920377 |
| H    | -2.266031 | -0.803595 | 1.545344  |
| H    | -2.372580 | 1.197358  | -2.917176 |
| C    | -0.061558 | 1.963620  | -1.363910 |
| H    | -0.084068 | 2.410118  | -2.360443 |
| C    | -0.029494 | 0.904377  | 1.015199  |
| H    | -0.034264 | 0.470932  | 2.017315  |
| N    | -3.294844 | -0.058653 | -1.572083 |
| C    | -4.398175 | -1.532559 | -0.033156 |
| C    | -4.268413 | -2.546716 | 0.913268  |
| C    | -6.689337 | -2.204259 | -0.388057 |
| C    | -5.338624 | -3.377891 | 1.210424  |
| H    | -3.315900 | -2.711945 | 1.408495  |
| C    | -6.554143 | -3.206145 | 0.564284  |
| H    | -7.636419 | -2.066192 | -0.901819 |
| H    | -5.218256 | -4.168755 | 1.945189  |

|   |           |           |           |
|---|-----------|-----------|-----------|
| H | -7.392855 | -3.855747 | 0.797529  |
| N | 3.131371  | 0.018386  | -1.450103 |
| C | 3.314189  | -0.616006 | -0.279151 |
| C | -5.618930 | -1.377476 | -0.687387 |
| H | -5.708633 | -0.598131 | -1.436747 |
| C | 4.450511  | -1.452255 | -0.017526 |
| C | 5.432329  | -1.634429 | -1.007507 |
| C | 4.630079  | -2.111709 | 1.211422  |
| C | 6.535967  | -2.436745 | -0.775990 |
| H | 5.319054  | -1.136274 | -1.966450 |
| C | 5.736182  | -2.909392 | 1.429789  |
| H | 3.897300  | -1.999890 | 2.004383  |
| C | 6.701033  | -3.081989 | 0.441493  |
| H | 7.277749  | -2.558349 | -1.560736 |
| H | 5.849068  | -3.406999 | 2.389155  |
| H | 7.567473  | -3.710663 | 0.620825  |

---

**Table S9.** Cartesian coordinates of **1H<sup>+</sup>** in the S<sub>1</sub> state (TDA-TD-LC-wHPBE, 6-31g(d)).

| Atom | X         | Y         | Z         |
|------|-----------|-----------|-----------|
| C    | 0.034055  | 3.119923  | 0.266351  |
| C    | 0.014869  | 2.619830  | -1.038241 |
| C    | -0.000613 | 3.487944  | -2.116257 |
| C    | 0.004014  | 4.857907  | -1.883280 |
| C    | 0.031302  | 5.352962  | -0.584945 |
| C    | 0.052148  | 4.483940  | 0.499209  |
| H    | -0.019097 | 3.103803  | -3.132306 |
| H    | -0.011801 | 5.546525  | -2.722250 |
| H    | 0.034394  | 6.425070  | -0.415540 |
| H    | 0.071341  | 4.871696  | 1.513929  |
| C    | -2.155306 | -0.301537 | -0.620712 |
| C    | -1.140413 | 0.601678  | -0.267348 |
| C    | -1.123641 | 1.107327  | 1.069677  |
| C    | -2.036570 | 0.693644  | 1.975505  |
| H    | -2.235728 | -0.675221 | -1.635825 |
| H    | -2.056339 | 1.017038  | 3.009601  |
| C    | 3.166859  | -0.602872 | 0.291369  |
| C    | 2.188173  | -0.232117 | -0.663147 |
| C    | 1.198235  | 0.641017  | -0.302239 |
| C    | 1.193898  | 1.149390  | 1.019011  |
| C    | 2.213363  | 0.724448  | 1.908882  |
| H    | 2.208462  | -0.640806 | -1.665407 |
| H    | 2.235290  | 1.102457  | 2.929378  |
| C    | 0.041694  | 2.041934  | 1.335984  |
| H    | 0.065445  | 2.437304  | 2.352923  |
| C    | 0.004375  | 1.104536  | -1.104953 |
| H    | 0.002392  | 0.718672  | -2.125567 |
| N    | 3.156692  | -0.104862 | 1.563791  |
| C    | 4.232333  | -1.530872 | -0.003592 |
| C    | 4.391634  | -2.120154 | -1.277668 |
| C    | 6.178286  | -2.749360 | 0.771764  |
| C    | 5.420580  | -3.000896 | -1.514570 |
| H    | 3.711075  | -1.886278 | -2.087166 |
| C    | 6.316032  | -3.319179 | -0.491054 |
| H    | 6.878743  | -2.999761 | 1.561082  |
| H    | 5.537938  | -3.447903 | -2.495724 |

|   |           |           |           |
|---|-----------|-----------|-----------|
| H | 7.126298  | -4.015353 | -0.684202 |
| C | -3.100490 | -0.685102 | 0.290471  |
| C | 5.151308  | -1.864742 | 1.016466  |
| H | 5.027817  | -1.407510 | 1.990363  |
| C | -4.229149 | -1.578217 | -0.001834 |
| C | -5.472408 | -1.381792 | 0.605187  |
| C | -4.078740 | -2.643350 | -0.892983 |
| C | -6.535557 | -2.225655 | 0.324497  |
| H | -5.628975 | -0.535174 | 1.269222  |
| C | -5.144130 | -3.480739 | -1.175564 |
| H | -3.110164 | -2.831226 | -1.346814 |
| C | -6.375738 | -3.277491 | -0.565944 |
| H | -7.497922 | -2.052290 | 0.795951  |
| H | -5.009653 | -4.307077 | -1.866629 |
| H | -7.208450 | -3.938266 | -0.784786 |
| H | -3.655172 | -0.543338 | 2.279429  |
| N | -3.029308 | -0.166108 | 1.584793  |

---

**Table S10.** Cartesian coordinates of  $1\text{H}_2^{2+}$  in the  $S_1$  state (TDA-TD-LC-wHPBE, 6-31g(d)).

| Atom | X         | Y         | Z         |
|------|-----------|-----------|-----------|
| C    | 2.885757  | -0.156930 | 0.000000  |
| C    | 2.263836  | 1.092035  | 0.000000  |
| C    | 3.015497  | 2.252283  | 0.000000  |
| C    | 4.403562  | 2.152692  | 0.000000  |
| C    | 5.022374  | 0.910232  | 0.000000  |
| C    | 4.265162  | -0.256819 | 0.000000  |
| H    | 2.535773  | 3.226898  | 0.000000  |
| H    | 5.006056  | 3.055335  | 0.000000  |
| H    | 6.105760  | 0.847024  | 0.000000  |
| H    | 4.753572  | -1.227203 | 0.000000  |
| C    | -0.446296 | 0.524137  | 2.250592  |
| C    | 0.373048  | 0.172602  | 1.201479  |
| C    | 1.010413  | -1.096588 | 1.198711  |
| C    | 0.794861  | -1.949487 | 2.240418  |
| H    | -0.911716 | 1.502827  | 2.285739  |
| H    | 1.230145  | -2.940621 | 2.309855  |
| C    | -0.635706 | -0.351518 | -3.329104 |
| C    | -0.446296 | 0.524137  | -2.250592 |
| C    | 0.373048  | 0.172602  | -1.201479 |
| C    | 1.010413  | -1.096588 | -1.198711 |
| C    | 0.794861  | -1.949487 | -2.240418 |
| H    | -0.911716 | 1.502827  | -2.285739 |
| H    | 1.230145  | -2.940621 | -2.309855 |
| C    | 1.904610  | -1.322107 | 0.000000  |
| H    | 2.392241  | -2.298427 | 0.000000  |
| C    | 0.740954  | 1.016042  | 0.000000  |
| H    | 0.260234  | 1.995375  | 0.000000  |
| C    | -1.416544 | -0.044418 | -4.507918 |
| C    | -2.498083 | 0.865596  | -4.432720 |
| C    | -1.870849 | -0.348821 | -6.868904 |
| C    | -3.244997 | 1.152642  | -5.550836 |
| H    | -2.766829 | 1.312092  | -3.480843 |
| C    | -2.937638 | 0.546452  | -6.772042 |
| H    | -1.627200 | -0.800636 | -7.824690 |
| H    | -4.080410 | 1.841538  | -5.483908 |
| H    | -3.530679 | 0.775548  | -7.652328 |

|   |           |           |           |
|---|-----------|-----------|-----------|
| C | -0.635706 | -0.351518 | 3.329104  |
| C | -1.117450 | -0.644049 | -5.754996 |
| H | -0.254121 | -1.295252 | -5.864576 |
| C | -1.416544 | -0.044418 | 4.507918  |
| C | -1.117450 | -0.644049 | 5.754996  |
| C | -2.498083 | 0.865596  | 4.432720  |
| C | -1.870849 | -0.348821 | 6.868904  |
| H | -0.254121 | -1.295252 | 5.864576  |
| C | -3.244997 | 1.152642  | 5.550836  |
| H | -2.766829 | 1.312092  | 3.480843  |
| C | -2.937638 | 0.546452  | 6.772042  |
| H | -1.627200 | -0.800636 | 7.824690  |
| H | -4.080410 | 1.841538  | 5.483908  |
| H | -3.530679 | 0.775548  | 7.652328  |
| H | -0.191651 | -2.243107 | 4.002636  |
| N | 0.005119  | -1.567637 | 3.273804  |
| H | -0.191651 | -2.243107 | -4.002636 |
| N | 0.005119  | -1.567637 | -3.273804 |

---

**Table S11.** Cartesian coordinates of **ppy** in the  $S_1$  state (TDA-TD-LC-wHPBE, 6-31g(d)).

| Atom | X         | Y         | Z         |
|------|-----------|-----------|-----------|
| C    | -1.573841 | 1.244183  | -0.001467 |
| C    | -2.719885 | -1.253926 | 0.000929  |
| H    | -1.098955 | 2.219979  | -0.002704 |
| H    | -3.052745 | -2.288740 | 0.001758  |
| N    | -1.445635 | -1.019415 | -0.001331 |
| C    | -0.682831 | 0.083706  | -0.001183 |
| C    | 0.750747  | 0.047233  | -0.000503 |
| C    | 1.426099  | -1.186543 | -0.000671 |
| C    | 1.528517  | 1.218766  | 0.000313  |
| C    | 2.808754  | -1.240631 | -0.000016 |
| H    | 0.850572  | -2.108064 | -0.001406 |
| C    | 2.908114  | 1.150528  | 0.000922  |
| H    | 1.049352  | 2.192677  | 0.000611  |
| C    | 3.564701  | -0.076547 | 0.000776  |
| H    | 3.301869  | -2.209013 | -0.000166 |
| H    | 3.483598  | 2.072265  | 0.001572  |
| H    | 4.649166  | -0.121696 | 0.001265  |
| C    | -2.920159 | 1.116467  | 0.000072  |
| H    | -3.528897 | 2.016189  | 0.000140  |
| C    | -3.571928 | -0.160271 | 0.001705  |
| H    | -4.644242 | -0.295479 | 0.002983  |

**Table S12.** Cartesian coordinates of **2** in the S<sub>1</sub> state (TDA-TD-LC-wHPBE, 6-31g(d)).

| Atom | X        | Y        | Z        |
|------|----------|----------|----------|
| C    | 0.233736 | 2.642708 | -0.62949 |
| C    | -0.19999 | 2.611992 | 0.699108 |
| C    | -0.4437  | 3.789474 | 1.379366 |
| C    | -0.24949 | 5.006952 | 0.731397 |
| C    | 0.181394 | 5.037269 | -0.58551 |
| C    | 0.424361 | 3.850643 | -1.27285 |
| H    | -0.7822  | 3.765812 | 2.411905 |
| H    | -0.43639 | 5.935676 | 1.262322 |
| H    | 0.33136  | 5.989831 | -1.0851  |
| H    | 0.76144  | 3.874614 | -2.30598 |
| C    | -2.50373 | -0.08566 | 0.689454 |
| C    | -1.34809 | 0.510581 | 0.332704 |
| C    | -0.89073 | 0.548348 | -1.03741 |
| C    | -1.69033 | -0.07493 | -1.96204 |
| H    | -2.8372  | -0.10921 | 1.722394 |
| H    | -1.47686 | -0.14847 | -3.02525 |
| C    | 1.743924 | -0.15642 | 1.945095 |
| C    | 0.96415  | 0.505977 | 1.020882 |
| C    | 1.399101 | 0.540282 | -0.30447 |
| C    | 2.588288 | -0.06928 | -0.63798 |
| H    | 1.437144 | -0.22299 | 2.988263 |
| H    | 2.935105 | -0.0836  | -1.66619 |
| C    | 0.43189  | 1.25902  | -1.22657 |
| H    | 0.768969 | 1.285692 | -2.26499 |
| C    | -0.36038 | 1.205623 | 1.253713 |
| H    | -0.67215 | 1.193119 | 2.300153 |
| N    | -2.78259 | -0.62882 | -1.50646 |
| C    | -3.36761 | -0.72403 | -0.30129 |
| C    | -4.63992 | -1.35669 | -0.10173 |
| C    | -5.32078 | -1.92694 | -1.192   |
| C    | -5.24922 | -1.43372 | 1.163207 |
| C    | -6.5487  | -2.54186 | -1.02127 |
| H    | -4.87162 | -1.88406 | -2.18042 |
| C    | -6.47457 | -2.05133 | 1.320194 |
| H    | -4.7612  | -1.00426 | 2.032417 |

|   |          |          |          |
|---|----------|----------|----------|
| C | -7.13866 | -2.61177 | 0.232934 |
| H | -7.05052 | -2.97372 | -1.88298 |
| H | -6.92201 | -2.09616 | 2.309385 |
| H | -8.10144 | -3.09531 | 0.364637 |
| C | 3.32558  | -0.69528 | 0.374666 |
| N | 2.89917  | -0.7419  | 1.635055 |
| C | 4.623881 | -1.36368 | 0.087058 |
| C | 5.065079 | -2.39132 | 0.918689 |
| C | 5.420725 | -0.98428 | -0.99096 |
| C | 6.26466  | -3.03657 | 0.666385 |
| H | 4.449503 | -2.6699  | 1.767446 |
| C | 6.624258 | -1.62705 | -1.24172 |
| H | 5.116731 | -0.16044 | -1.63027 |
| C | 7.047746 | -2.65875 | -0.41669 |
| H | 6.591434 | -3.84034 | 1.319938 |
| H | 7.237293 | -1.31368 | -2.08186 |
| H | 7.9893   | -3.16341 | -0.6132  |

---

**Table S13.** Cartesian coordinates of  $2\text{H}^+$  in the  $S_1$  state (TDA-TD-LC-wHPBE, 6-31g(d)).

| Atom | X        | Y        | Z        |
|------|----------|----------|----------|
| C    | -0.28534 | 2.832064 | 0.660794 |
| C    | 0.130685 | 2.826456 | -0.67278 |
| C    | 0.293571 | 4.014688 | -1.36462 |
| C    | 0.055217 | 5.21715  | -0.70691 |
| C    | -0.35184 | 5.22449  | 0.622036 |
| C    | -0.52614 | 4.029522 | 1.312741 |
| H    | 0.613982 | 4.010948 | -2.40324 |
| H    | 0.190094 | 6.155859 | -1.23587 |
| H    | -0.5372  | 6.169001 | 1.124685 |
| H    | -0.84759 | 4.038242 | 2.351126 |
| C    | 2.462758 | -0.02941 | -0.639   |
| C    | 1.30109  | 0.690679 | -0.30307 |
| C    | 0.886336 | 0.729905 | 1.065008 |
| C    | 1.614633 | 0.097453 | 2.011028 |
| H    | 2.784579 | -0.12133 | -1.67124 |
| H    | 1.356463 | 0.078039 | 3.063925 |
| C    | -1.60357 | -0.12434 | -1.94247 |
| C    | -0.88608 | 0.661438 | -0.99611 |
| C    | -1.35469 | 0.679847 | 0.344053 |
| C    | -2.47232 | -0.03195 | 0.664849 |
| H    | -1.25614 | -0.18514 | -2.97238 |
| H    | -2.8326  | -0.04467 | 1.686402 |
| C    | -0.43277 | 1.447436 | 1.261679 |
| H    | -0.77346 | 1.460457 | 2.298533 |
| C    | 0.369577 | 1.431964 | -1.22957 |
| H    | 0.693464 | 1.428681 | -2.27177 |
| C    | 3.195965 | -0.64973 | 0.335076 |
| C    | 4.419386 | -1.42938 | 0.086086 |
| C    | 4.67485  | -2.60232 | 0.801364 |
| C    | 5.346987 | -1.00431 | -0.86749 |
| C    | 5.829451 | -3.33388 | 0.564353 |
| H    | 3.948813 | -2.97322 | 1.521481 |
| C    | 6.497015 | -1.7405  | -1.10562 |
| H    | 5.179978 | -0.07518 | -1.40542 |
| C    | 6.743248 | -2.90582 | -0.38959 |

|   |          |          |          |
|---|----------|----------|----------|
| H | 6.010477 | -4.24902 | 1.12032  |
| H | 7.213345 | -1.39448 | -1.84486 |
| H | 7.647358 | -3.47817 | -0.57384 |
| C | -3.14863 | -0.75768 | -0.35376 |
| N | -2.67072 | -0.79977 | -1.63589 |
| C | -4.36595 | -1.48767 | -0.114   |
| C | -4.93069 | -2.25431 | -1.1624  |
| C | -5.02867 | -1.46429 | 1.136981 |
| C | -6.09429 | -2.96449 | -0.96362 |
| H | -4.42334 | -2.27337 | -2.11951 |
| C | -6.19151 | -2.17455 | 1.324983 |
| H | -4.63926 | -0.87702 | 1.960289 |
| C | -6.72776 | -2.92871 | 0.277323 |
| H | -6.51598 | -3.55211 | -1.7726  |
| H | -6.69513 | -2.14716 | 2.2858   |
| H | -7.64514 | -3.48886 | 0.432898 |
| H | 3.378023 | -0.90711 | 2.374402 |
| N | 2.760162 | -0.56779 | 1.651151 |

---

**Table S14.** Cartesian coordinates of  $2\text{H}_2^{2+}$  in the  $S_1$  state (TDA-TD-LC-wHPBE, 6-31g(d)).

| Atom | X        | Y        | Z        |
|------|----------|----------|----------|
| C    | 0.211687 | 2.551599 | -0.66483 |
| C    | -0.21169 | 2.551599 | 0.664832 |
| C    | -0.4239  | 3.741841 | 1.335899 |
| C    | -0.20999 | 4.939831 | 0.661539 |
| C    | 0.20997  | 4.939831 | -0.66155 |
| C    | 0.423889 | 3.741841 | -1.3359  |
| H    | -0.75269 | 3.746659 | 2.371282 |
| H    | -0.37374 | 5.881526 | 1.175486 |
| H    | 0.373716 | 5.881526 | -1.17549 |
| H    | 0.752676 | 3.746659 | -2.37129 |
| C    | -2.57972 | -0.10545 | 0.647018 |
| C    | -1.36763 | 0.457077 | 0.317401 |
| C    | -0.93129 | 0.455987 | -1.03358 |
| C    | -1.72833 | -0.10308 | -1.98605 |
| H    | -2.91793 | -0.13197 | 1.676909 |
| H    | -1.48569 | -0.12025 | -3.04304 |
| C    | 1.728333 | -0.10307 | 1.986049 |
| C    | 0.931292 | 0.455994 | 1.033581 |
| C    | 1.367637 | 0.457084 | -0.3174  |
| C    | 2.579729 | -0.10544 | -0.64702 |
| H    | 1.4857   | -0.12024 | 3.043039 |
| H    | 2.917941 | -0.13196 | -1.67691 |
| C    | 0.395825 | 1.153642 | -1.24428 |
| H    | 0.722237 | 1.156966 | -2.28542 |
| C    | -0.39583 | 1.153642 | 1.244277 |
| H    | -0.72224 | 1.156966 | 2.285424 |
| C    | -3.38951 | -0.67959 | -0.3451  |
| C    | -4.66592 | -1.31328 | -0.09486 |
| C    | -5.14213 | -2.34883 | -0.93533 |
| C    | -5.46957 | -0.89485 | 0.993225 |
| C    | -6.36889 | -2.92754 | -0.70052 |
| H    | -4.52328 | -2.7365  | -1.7405  |
| C    | -6.69308 | -1.47989 | 1.218907 |
| H    | -5.14111 | -0.07862 | 1.62858  |
| C    | -7.14975 | -2.49521 | 0.373542 |

|   |          |          |          |
|---|----------|----------|----------|
| H | -6.72443 | -3.72715 | -1.34183 |
| H | -7.31126 | -1.1445  | 2.044945 |
| H | -8.11805 | -2.95231 | 0.554155 |
| C | 3.389516 | -0.67957 | 0.345097 |
| C | 4.665921 | -1.31327 | 0.094863 |
| C | 5.142131 | -2.34882 | 0.935327 |
| C | 5.469581 | -0.89485 | -0.99322 |
| C | 6.368886 | -2.92754 | 0.700515 |
| H | 4.523273 | -2.73649 | 1.740497 |
| C | 6.693081 | -1.47989 | -1.21891 |
| H | 5.141122 | -0.07861 | -1.62858 |
| C | 7.149751 | -2.49522 | -0.37355 |
| H | 6.724422 | -3.72716 | 1.341826 |
| H | 7.311268 | -1.14451 | -2.04494 |
| H | 8.118042 | -2.95232 | -0.55416 |
| H | -3.53136 | -0.97818 | -2.37286 |
| N | -2.91406 | -0.66136 | -1.63454 |
| H | 3.531365 | -0.97816 | 2.372858 |
| N | 2.914062 | -0.66135 | 1.634541 |

---
